# Supplementary material for: Endurance exercise ameliorates phenotypes in Drosophila models of spinocerebellar ataxias
Source: eLife journal article supplement (doi:10.7554/elife.75389), 2022-02-16
Supplement: supp [file 22_02_04_Sujkowski et al source data.xlsx]

## Sheet: Figure 1
Figure 1C	ATXN2				Figure 1D	ATXN3				Figure 1E	a1ACT
RU- UN	RU- EX	RU+ UN	RU+ EX		RU- UN	RU- EX	RU+ UN	RU+ EX		RU- UN	RU- EX	RU+ UN	RU+ EX
- -	- +	+ -	+ +		- -	- +	+ -	+ +		- -	- +	+ -	+ +
223.129	337.294	178.845	332.833		255.799	366.685	266.536	290.076		242.448	469.406	136.842	311.29
208.111	344.898	185.135	353.582		254.537	347.847	146.787	206.154		237.787	520.467	150.71	325.392
228.099	350.031	201.294	361.905		275.401	342.097	170.46	218.19		229.465	427.579	142.62	299.045
222.856	318.195	190.16	391.881		157.111	316.051	226.238	223.597		179.608	438.211	164.11	353.24
222.788	330.924	173.556	328.379		277.838	341.717	218.426	192.224		251.785	331.342	111.288	211.624
204.471	327.699	171.567	327.38		264.352	339.837	265.2	210.925		263.368	265.975	105.263	213.377
221.821	342.488	189.022	309.928		215.17	424.877	192.958	218.458		304.637	284.296	163.651	297.311
218.717	314.072	152.831	304.972		258.855	349.279	229.887	219.901		252.274	351.12	162.465	266.204
213.462	326.66	162.217	320.119		218.978	278.33	137.086	166.99		202.697	356.712	166.738	262.767
190.381	327.619	165.898	277.249		189.625	280.167	97.5211	138.811		251.143	496.777	177.065	225.417

## Sheet: Figure 2
Figure 2A
Time to Fatigue (Minutes)	ELAV GS>ATXN2Q117 RU- UN	ELAV GS>ATXN2Q117 RU- EX	ELAV GS>ATXN2Q117 RU+ UN	ELAV GS>ATXN2Q117RU+ EX
40	1
55	1
65	1
85	1
105	1
130	1
150	1
160	1
70		1
90		1
140		1
200		1
240		1
250		1
275		1
305		1
30			1
45			1
60			1
75			1
90			1
100			1
110			1
120			1
80				1
135				1
175				1
190				1
230				1
255				1
270				1
300				1
Figure 2B
Age (weeks)	RU- UN																				RU- EX																				RU+ UN
0	1.57647	1.44186	1.81522	1.52174	1.69663	1.91209	1.78947	2.03192	1.82474	2.35227	2.03	2.27778	2.26087	2.22222	2.28889	2.47917	1.3125	1.73404	1.56122	1.95918	1.60465	1.89286	1.94505	2.01075	1.83544	1.61539	1.97802	2.11628	1.73196	1.94	2.0202	1.90816	2.12903	2.04	2.02105	2.32979	1.39535	1.53846	1.8866	1.68421	2.17895	1.8587	1.9	1.85393	2.02062	1.88421	2.3	2.125	2.16667
1	1.94845	1.97778	1.89474	2.13542	1.46739	1.54082	1.40404	1.48936	1.5914	1.68041	1.61111	1.77895	1.31395	1.45556	1.48352	1.54444	0.804598	0.860465	0.659091	0.926829	1.86	1.73034	1.95652	2.07778	1.17978	1.21429	1.17046	1.43678	1.45833	1.31111	1.43529	1.39175	1.03704	1.25581	1.42391	1.47674	0.945205	0.944444	0.935484	1.10227	1.69388	1.87368	1.89	1.96907	1.90526	1.47312	1.4898	1.5914	1.47826
2	1.125	1.05747	1.17778	0.85	0.89011	0.886364	0.909091	0.772152	1.10989	0.965909	0.988235	0.8	0.879518	0.730769	0.964706	0.978261	1.05128	1.02381	1.01316	1.075	1.21591	1.09195	1.3	1.25287	1.24706	1.21111	1.08046	1.22353	1.18391	1.34884	1.19767	1.23171	1.45349	1.18681	1.2561	1.19512	1.26744	1.25287	1.45263	1.1954	1.25556	1.29546	1.14894	1.50575	1.01124	0.850575	0.805195	0.857143	1.02062
3	1.03448	0.857143	0.888889	1.06742	0.894118	0.714286	0.804598	0.692308	0.675325	0.72619	0.890244	0.925	0.775	0.6375	0.701299	0.820513	0.735294	0.59375	0.704225	0.75	1.4086	1.5	1.46591	1.48276	1.10843	1.12941	0.892857	1.15663	1.23529	1.22093	1.36956	1.04938	0.636364	0.772152	0.815789	1.09412	1.07143	1.0303	0.817073	1.125	0.785714	0.942029	0.864198	0.863014	0.535211	0.692308	0.802632	0.865854	0.605263
4	0.341263	0.288942	0.511554	0.558551	0.918786	0.657118	0.720402	0.843121	0.598708	0.724864	0.604549	0.689974	0.504296	0.513178	0.712256	0.613159	0.368205	0.407977	0.33216	0.356328	0.743243	1.01408	0.745098	0.866667	1.14493	1.40541	1.16438	1.13044	1.44286	1.0411	0.958333	0.898551	0.920635	1	0.943662	0.842105	0.636364	0.8125	0.627119	0.78125	0.289888	0.1523	0.353762	0.261835	0.382837	0.5002	0.37863	0.389279	0.347866
5	0.400046	0.364507	0.437317	0.475444	0.332811	0.503387	0.459808	0.416701	0.321694	0.524274	0.413985	0.41449	0.310016	0.35618	0.331592	0.32039					0.653333	0.564516	0.923077	0.69697	0.629032	0.634615	1.03226	0.672414	0.77193	0.746032	0.785714	0.847458	0.885246	0.756757	0.589286	0.786885					0.220867	0.133993	0.266268	0.195836	0.276665	0.241187	0.284618	0.2886	0.222991
Figure 2C
Figure 2D
Time to Fatigue (Minutes)	ELAV GS>Sca3Q77 RU- UN	ELAV GS>Sca3Q77 RU- EX	ELAV GS>Sca3Q77 RU+ UN	ELAV GS>Sca3Q77 RU+ EX
265	1
160	1
145	1
300	1
130	1
175	1
215	1
280	1
260		1
380		1
440		1
230		1
285		1
350		1
305		1
200		1
220			1
255			1
60			1
130			1
155			1
180			1
170			1
105			1
200				1
175				1
160				1
225				1
300				1
355				1
135				1
240				1
Figure 2E
Age (weeks)	RU- UN																				RU- EX																				RU+ UN
0	2.29546	2.33333	2.45918	2.29787	2.17582	2.13483	2.30233	2.30208	2.55556	2.26882	2.38298	2.50588	2.43956	2.20225	2.20225	2.83146	1.54321	1.8	1.72839	2.10417	2.68293	2.20548	2.76667	2.84615	2.34524	2.5	2.60227	2.40476	2.6087	2.35556	2.16304	2.32222	2.45349	2.46808	2.52809	2.2907	1.54348	1.97872	1.93258	1.8913	2.46392	2.57831	2.69231	2.3587	2.66667	2.62366	2.58947	2.57778	2.18681
1	1.8172	1.75556	1.95876	1.72414	1.98823	2.08602	2.11702	1.83908	1.75824	2.19417	1.93333	2.07368	1.07778	0.860465	1.10526	1.06977	1.4023	1.01149	1.65909	1.32911	1.83951	1.89011	1.85556	1.85058	2.11881	1.89247	1.84444	1.81707	2.18605	1.91304	2.48809	2	1.09524	1.12371	1.32222	1.19767	2.17204	1.8046	1.82418	2.17526	1.72222	1.87629	1.75	1.7931	2.15385	1.84762	2.09184	2	1.92857
2	0.514026	0.772902	0.724124	0.831806	0.67946	0.81065	0.700945	0.68238	0.735018	0.744522	0.622135	0.587183	0.668494	0.752516	0.627013	0.666933	0.399412	0.434563	0.471733	0.478164	2.13402	1.86813	1.75824	2.16129	1.59036	1.45652	1.62791	1.56471	1.48889	1.70454	1.64286	1.46067	1.4382	1.98969	1.62963	1.84706	1.17647	1.1573	1.11494	1.17347	0.65944	0.65651	0.628858	0.608562	0.600466	0.694744	0.564188	0.646252	0.647611
3	0.391639	0.506238	0.503947	0.422644	0.450607	0.396456	0.469642	0.305203	0.443653	0.440594	0.352073	0.423374	0.328601	0.333783	0.334469	0.372725	0.338453	0.297759	0.388375	0.301006	1.12903	1.21591	1.28261	1.32979	1.28889	1.25263	1.23595	1.11236	1.19277	1.18478	1.51546	1.26582	1.1087	1.04546	1.03448	0.989474	1.13684	1.03571	1.15663	0.946809	0.400311	0.559964	0.466526	0.452402	0.384016	0.40006	0.476857	0.373495	0.491226
4	0.401583	0.290176	0.302368	0.28557	0.273261	0.465071	0.279621	0.321266	0.358892	0.347315	0.250894	0.230161	0.338175	0.245778	0.203979	0.382923					0.9	0.820513	0.688525	0.918919	0.948052	1.07143	0.878788	0.891892	1.14286	0.681159	0.552632	0.62963	0.653333	0.849315	0.876712	0.987179					0.288332	0.186508	0.140681	0.152677	0.237553	0.226755	0.210163	0.193761	0.307739
Figure 2F
Figure 2G
Time to Fatigue (Minutes)	ELAV GS>Sca6Q70	ELAV GS>Sca6Q70	ELAV GS>Sca6Q70	ELAV GS>Sca6Q70
40	1
70	1
90	1
100	1
115	1
135	1
150	1
165	1
90		1
120		1
150		1
210		1
240		1
270		1
300		1
330		1
30			1
40			1
55			1
65			1
80			1
95			1
105			1
115			1
60				1
75				1
85				1
120				1
145				1
180				1
190				1
210				1
Figure 2H
Age (weeks)	RU- UN																				RU- EX																				RU+ UN
0	3.14852	2.84536	2.61765	2.94	2.90196	2.47059	2.89362	2.71579	2.88542	2.51613	2.77419	2.83838	2.82609	2.54348	2.73684	2.79798	2.26531	2.4	2.20619	2.34694	3.22581	2.68367	2.75532	3.29167	2.76	3.0495	2.61458	2.76344	2.39394	2.58333	2.40206	2.76289	2.71134	2.65934	2.84946	2.69792	2.68539	2.51042	2.52747	2.5	2.86274	2.68421	2.60825	2.87	2.46316	2.65591	2.53261	2.80392	2.87
1	2.33663	2.13333	1.9703	2.48	2.7732	2.68041	2.63917	2.60784	2.41837	2.70103	2.49495	2.45454	1.6413	1.91753	1.78947	2.31111	1.25287	1.2967	1.3	1.39362	2.45652	2.26374	2.4	2.43011	2.63043	2.45745	2.54546	2.42857	2.59375	2.55914	2.42222	2.56667	2.37778	2.03261	1.98925	2.07292	3.02105	2.08333	2.28723	2	2.40449	2.29897	2.09783	2.2	2.34021	2.48	2.30435	2.19565	2.5
2	1.16092	1.16279	1.04878	1.03297	1.1358	1.26087	0.94382	1.4186	1.31579	1.21111	1.21111	1.5	0.963855	1.17647	1.09474	0.977011	0.797468	0.9	0.9125	0.74359	2.06593	2.05208	1.83516	1.67416	1.62222	1.40449	1.67416	1.34444	1.65556	1.53261	1.47778	1.56818	1.68182	1.78409	1.47059	1.69767	1.7234	1.31111	1.32292	1.27273	1.74713	1.69893	1.5579	1.52	1.47727	1.46875	1.4	1.57778	1.38202
3	0.701299	0.708333	0.670732	1.02439	0.894737	0.94382	0.701299	0.71831	0.652778	0.717647	1.17857	1.25556	0.734177	0.888889	0.75641	0.822785	0.88764	1.04478	0.977011	0.764706	1.29885	1.26191	1.37778	1.39785	1.64773	1.6	1.47826	1.62222	1.51685	1.69474	1.46739	1.51613	1.19318	1.29341	1.31136	1.19048	1.31461	1.75532	1.51136	1.54444	0.677966	0.828571	0.86129	0.953521	0.716418	0.815625	0.769231	1.12329	0.451619
4	0.470325	0.400625	0.465442	0.400992	0.529241	0.58679	0.495609	0.475579	0.479393	0.688567	0.538936	0.465843	0.529397	0.511356	0.500781	0.40593	0.374468	0.30732	0.333201	0.23113	1.3253	1.42222	1.39326	1.38044	1.27161	1.32143	1.3125	1.48052	1.3494	1.5	1.61364	1.50562	1.38044	1.45161	1.35294	1.41176	1.17333	1.38442	1.29868	1.09876	0.460109	0.339465	0.432995	0.428125	0.284253	0.435295	0.343817	0.34143	0.451619
5	0.318501	0.300007	0.357701	0.373717	0.2401	0.249307	0.245	0.268276	0.243435	0.2254	0.215538	0.263804	0.331007	0.247299	0.327892	0.264387					1.1358	0.975904	0.963415	1.08974	0.915493	0.78481	0.811765	0.814286	0.835821	0.916667	0.792208	0.741573	1.28571	1.14815	0.835616	1					0.182868	0.206253	0.163247	0.162272	0.160308	0.129354	0.165273	0.15854	0.195897
Figure 2I
Atxn2			Atxn3
-	+		-	+
1	0.432915		1	0.931601
1	0.330259		1	0.999018
1	0.731247		1	0.996495
[truncated: 31 more columns]

## Sheet: Figure 3
Figure 3A						Figure 3B						Figure 3C
Age (Days)	RU- UN	RU- EX	RU+ UN	RU+ EX		Age (Days)	RU- UN	RU- EX	RU+ UN	RU+ EX		Age (Days)	RU- UN	RU- EX	RU+ UN	RU+ EX
3	1					3	1					3	1
3	1					7	1					6	1
3	1					13	1					8	1
15	1					14	1					10	1
15	1					17	1					13	1
21	1					20	1					15	1
22	1					20	1					20	1
23	1					20	1					31	1
27	1					20	1					34	1
27	1					21	1					36	1
27	1					22	1					36	1
27	1					22	1					36	1
27	1					22	1					36	1
29	1					23	1					38	1
29	1					23	1					38	1
29	1					24	1					41	1
29	1					24	1					41	1
29	1					27	1					41	1
31	1					27	1					41	1
31	1					27	1					41	1
31	1					27	1					41	1
31	1					27	1					41	1
31	1					27	1					41	1
34	1					27	1					41	1
34	1					29	1					41	1
34	1					29	1					41	1
34	1					29	1					43	1
34	1					29	1					43	1
34	1					29	1					43	1
34	1					29	1					43	1
34	1					29	1					43	1
36	1					29	1					43	1
36	1					29	1					43	1
36	1					29	1					43	1
36	1					29	1					43	1
36	1					29	1					43	1
36	1					29	1					43	1
36	1					31	1					43	1
36	1					31	1					45	1
36	1					31	1					45	1
36	1					31	1					45	1
36	1					31	1					45	1
36	1					31	1					45	1
38	1					31	1					45	1
38	1					31	1					45	1
38	1					31	1					45	1
38	1					31	1					45	1
38	1					31	1					45	1
38	1					34	1					45	1
38	1					34	1					48	1
38	1					34	1					48	1
38	1					34	1					48	1
38	1					34	1					48	1
38	1					34	1					48	1
38	1					34	1					48	1
38	1					34	1					48	1
38	1					34	1					48	1
38	1					34	1					48	1
38	1					34	1					48	1
41	1					34	1					48	1
41	1					34	1					48	1
41	1					34	1					48	1
41	1					34	1					48	1
41	1					34	1					48	1
41	1					34	1					48	1
41	1					34	1					48	1
41	1					34	1					48	1
41	1					34	1					48	1
41	1					34	1					48	1
41	1					34	1					48	1
41	1					34	1					48	1
41	1					34	1					48	1
41	1					34	1					48	1
41	1					34	1					48	1
41	1					34	1					48	1
41	1					34	1					48	1
41	1					36	1					48	1
41	1					36	1					48	1
41	1					36	1					48	1
41	1					36	1					48	1
41	1					36	1					48	1
41	1					36	1					48	1
41	1					36	1					48	1
41	1					36	1					48	1
41	1					36	1					48	1
41	1					36	1					48	1
41	1					36	1					48	1
43	1					36	1					48	1
43	1					36	1					48	1
43	1					36	1					50	1
43	1					36	1					50	1
43	1					36	1					50	1
43	1					36	1					50	1
43	1					36	1					50	1
43	1					36	1					50	1
43	1					36	1					50	1
43	1					36	1					50	1
43	1					36	1					50	1
43	1					36	1					50	1
43	1					38	1					50	1
43	1					38	1					50	1
43	1					38	1					50	1
43	1					38	1					50	1
43	1					38	1					50	1
43	1					38	1					50	1
43	1					38	1					50	1
43	1					38	1					50	1
43	1					38	1					50	1
45	1					38	1					50	1
45	1					38	1					50	1
45	1					38	1					50	1
45	1					38	1					50	1
45	1					38	1					50	1
45	1					38	1					50	1
45	1					38	1					50	1
45	1					38	1					52	1
45	1					38	1					52	1
45	1					38	1					52	1
45	1					38	1					52	1
45	1					38	1					52	1
45	1					38	1					52	1
45	1					38	1					52	1
45	1					38	1					52	1
45	1					38	1					52	1
45	1					38	1					52	1
45	1					38	1					52	1
45	1					38	1					52	1
45	1					38	1					52	1
45	1					38	1					52	1
45	1					38	1					52	1
45	1					38	1					52	1
45	1					41	1					52	1
48	1					41	1					52	1
48	1					41	1					52	1
48	1					41	1					52	1
48	1					41	1					52	1
48	1					41	1					52	1
48	1					41	1					52	1
48	1					41	1					52	1
48	1					41	1					52	1
48	1					41	1					52	1
48	1					41	1					52	1
48	1					41	1					52	1
48	1					41	1					52	1
48	1					41	1					52	1
48	1					41	1					52	1
48	1					41	1					52	1
48	1					41	1					52	1
48	1					41	1					55	1
48	1					41	1					55	1
48	1					41	1					55	1
48	1					41	1					55	1
48	1					41	1					55	1
48	1					41	1					55	1
48	1					41	1					55	1
48	1					41	1					55	1
48	1					41	1					55	1
48	1					41	1					55	1
48	1					41	1					55	1
48	1					41	1					55	1
48	1					41	1					55	1
48	1					41	1					55	1
48	1					41	1					55	1
48	1					41	1					55	1
48	1					41	1					55	1
48	1					41	1					55	1
48	1					41	1					55	1
48	1					41	1					55	1
48	1					41	1					55	1
48	1					41	1					55	1
48	1					41	1					55	1
48	1					41	1					55	1
48	1					41	1					55	1
48	1					41	1					55	1
48	1					41	1					55	1
48	1					41	1					55	1
50	1					41	1					55	1
50	1					41	1					55	1
50	1					41	1					55	1
50	1					41	1					55	1
50	1					41	1					55	1
50	1					43	1					55	1
50	1					43	1					55	1
50	1					43	1					55	1
50	1					43	1					55	1
50	1					43	1					55	1
50	1					43	1					55	1
50	1					43	1					55	1
50	1					43	1					55	1
50	1					43	1					55	1
50	1					43	1					55	1
50	1					43	1					55	1
50	1					43	1					55	1
50	1					45	1					55	1
50	1					45	1					55	1
50	1					45	1					55	1
50	1					45	1					55	1
50	1					45	1					55	1
50	1					45	1					55	1
50	1					45	1					55	1
50	1					45	1					55	1
50	1					45	1					55	1
50	1					45	1					55	1
50	1					45	1					55	1
50	1					45	1					55	1
50	1					45	1					55	1
50	1					45	1					55	1
50	1					45	1					55	1
50	1					45	1					55	1
50	1					45	1					55	1
50	1					45	1					55	1
50	1					45	1					55	1
50	1					45	1					55	1
50	1					45	1					55	1
50	1					45	1					55	1
50	1					45	1					55	1
50	1					45	1					55	1
50	1					45	1					55	1
50	1					45	1					55	1
52	1					45	1					57	1
52	1					45	1					57	1
52	1					45	1					57	1
52	1					45	1					57	1
52	1					45	1					57	1
52	1					45	1					57	1
52	1					45	1					57	1
52	1					45	1					57	1
52	1					45	1					57	1
52	1					45	1					57	1
52	1					45	1					57	1
52	1					45	1					57	1
52	1					45	1					57	1
52	1					45	1					57	1
52	1					45	1					57	1
52	1					45	1					57	1
52	1					48	1					57	1
52	1					48	1					57	1
52	1					48	1					57	1
52	1					48	1					57	1
52	1					48	1					59	1
52	1					48	1					59	1
52	1					48	1					59	1
52	1					48	1					59	1
52	1					48	1					59	1
52	1					48	1					59	1
52	1					48	1					59	1
52	1					48	1					59	1
55	1					48	1					59	1
55	1					48	1					59	1
55	1					48	1					59	1
55	1					48	1					59	1
55	1					48	1					59	1
55	1					48	1					59	1
55	1					48	1					59	1
55	1					50	1					59	1
55	1					50	1					59	1
55	1					50	1					59	1
55	1					50	1					59	1
55	1					50	1					59	1
55	1					50	1					59	1
55	1					50	1					59	1
55	1					50	1					59	1
55	1					50	1					59	1
55	1					50	1					59	1
55	1					50	1					59	1
55	1					52	1					59	1
55	1					52	1					59	1
55	1					55	1					59	1
55	1					55	1					62	1
55	1					6		1				62	1
55	1					6		1				62	1
55	1					7		1				62	1
55	1					9		1				62	1
55	1					10		1				62	1
57	1					15		1				62	1
57	1					17		1				62	1
59	1					22		1				62	1
59	1					23		1				62	1
3		1				23		1				64	1
3		1				23		1				64	1
5		1				23		1				64	1
6		1				23		1				64	1
6		1				24		1				64	1
10		1				27		1				66	1
17		1				27		1				66	1
21		1				27		1				66	1
22		1				27		1				3		1
23		1				27		1				3		1
24		1				29		1				3		1
24		1				29		1				5		1
27		1				29		1				6		1
27		1				29		1				9		1
27		1				29		1				14		1
27		1				29		1				20		1
27		1				29		1				20		1
27		1				29		1				23		1
27		1				31		1				27		1
27		1				31		1				34		1
29		1				31		1				34		1
29		1				31		1				34		1
29		1				31		1				36		1
29		1				31		1				36		1
29		1				31		1				38		1
29		1				31		1				38		1
29		1				31		1				38		1
29		1				31		1				38		1
29		1				31		1				38		1
31		1				31		1				38		1
31		1				31		1				41		1
31		1				31		1				41		1
31		1				31		1				41		1
31		1				31		1				41		1
31		1				31		1				41		1
31		1				31		1				41		1
31		1				31		1				41		1
34		1				31		1				41		1
34		1				31		1				41		1
34		1				31		1				41		1
34		1				34		1				41		1
34		1				34		1				41		1
34		1				34		1				41		1
36		1				34		1				41		1
36		1				34		1				41		1
36		1				34		1				43		1
36		1				34		1				43		1
36		1				34		1				43		1
36		1				34		1				43		1
36		1				34		1				43		1
36		1				34		1				43		1
36		1				34		1				43		1
36		1				34		1				43		1
36		1				34		1				43		1
36		1				34		1				43		1
36		1				34		1				45		1
36		1				34		1				45		1
36		1				34		1				45		1
36		1				34		1				45		1
36		1				34		1				45		1
38		1				34		1				45		1
38		1				34		1				45		1
38		1				34		1				45		1
38		1				34		1				45		1
38		1				34		1				45		1
38		1				34		1				48		1
38		1				36		1				48		1
38		1				36		1				48		1
38		1				36		1				48		1
38		1				36		1				48		1
38		1				36		1				48		1
38		1				36		1				48		1
38		1				36		1				48		1
38		1				36		1				48		1
38		1				36		1				48		1
38		1				36		1				48		1
38		1				36		1				48		1
38		1				36		1				48		1
38		1				36		1				48		1
38		1				36		1				48		1
38		1				36		1				48		1
38		1				36		1				48		1
38		1				36		1				48		1
38		1				38		1				48		1
38		1				38		1				48		1
38		1				38		1				48		1
38		1				38		1				48		1
38		1				38		1				48		1
38		1				38		1				48		1
38		1				38		1				48		1
38		1				38		1				48		1
38		1				38		1				48		1
38		1				38		1				48		1
38		1				38		1				48		1
41		1				38		1				48		1
41		1				38		1				48		1
41		1				38		1				48		1
41		1				38		1				48		1
41		1				38		1				48		1
41		1				38		1				48		1
41		1				38		1				50		1
41		1				38		1				50		1
41		1				38		1				50		1
41		1				38		1				50		1
41		1				38		1				50		1
41		1				38		1				50		1
41		1				38		1				50		1
41		1				38		1				50		1
41		1				38		1				50		1
41		1				38		1				50		1
41		1				38		1				50		1
41		1				38		1				50		1
41		1				38		1				50		1
41		1				38		1				50		1
41		1				38		1				50		1
41		1				38		1				50		1
41		1				38		1				50		1
41		1				38		1				50		1
41		1				38		1				50		1
41		1				41		1				50		1
41		1				41		1				50		1
41		1				41		1				50		1
41		1				41		1				50		1
41		1				41		1				50		1
41		1				41		1				50		1
41		1				41		1				50		1
41		1				41		1				50		1
41		1				41		1				50		1
41		1				41		1				50		1
41		1				41		1				50		1
41		1				41		1				50		1
41		1				41		1				52		1
41		1				41		1				52		1
43		1				41		1				52		1
43		1				41		1				52		1
43		1				41		1				52		1
43		1				41		1				52		1
43		1				41		1				52		1
43		1				41		1				52		1
43		1				41		1				52		1
43		1				41		1				52		1
43		1				41		1				52		1
43		1				41		1				52		1
43		1				41		1				52		1
43		1				41		1				52		1
43		1				41		1				52		1
43		1				41		1				52		1
43		1				41		1				52		1
43		1				41		1				52		1
43		1				41		1				52		1
43		1				41		1				52		1
43		1				41		1				52		1
43		1				41		1				52		1
43		1				41		1				52		1
43		1				41		1				52		1
43		1				41		1				52		1
43		1				41		1				52		1
43		1				41		1				52		1
43		1				41		1				52		1
43		1				41		1				52		1
43		1				41		1				52		1
43		1				41		1				52		1
43		1				41		1				52		1
43		1				41		1				52		1
43		1				43		1				52		1
43		1				43		1				52		1
43		1				43		1				52		1
45		1				43		1				55		1
45		1				43		1				55		1
45		1				43		1				55		1
45		1				43		1				55		1
45		1				43		1				55		1
45		1				43		1				55		1
45		1				43		1				55		1
45		1				43		1				55		1
45		1				43		1				55		1
45		1				43		1				55		1
45		1				43		1				55		1
45		1				43		1				55		1
45		1				43		1				55		1
45		1				43		1				55		1
45		1				43		1				55		1
45		1				43		1				55		1
45		1				43		1				55		1
45		1				43		1				55		1
45		1				43		1				55		1
45		1				43		1				55		1
45		1				43		1				55		1
45		1				45		1				55		1
45		1				45		1				55		1
45		1				45		1				55		1
48		1				45		1				55		1
48		1				45		1				55		1
48		1				45		1				55		1
48		1				45		1				55		1
48		1				45		1				55		1
48		1				45		1				55		1
48		1				45		1				55		1
48		1				45		1				55		1
48		1				45		1				55		1
48		1				45		1				55		1
48		1				45		1				55		1
48		1				45		1				55		1
48		1				45		1				55		1
48		1				45		1				55		1
48		1				45		1				55		1
48		1				45		1				55		1
48		1				45		1				55		1
48		1				45		1				55		1
48		1				45		1				55		1
48		1				45		1				55		1
48		1				45		1				55		1
48		1				45		1				55		1
48		1				45		1				55		1
48		1				45		1				55		1
48		1				45		1				55		1
48		1				45		1				55		1
48		1				45		1				55		1
48		1				45		1				55		1
48		1				45		1				55		1
48		1				45		1				55		1
48		1				45		1				55		1
48		1				45		1				55		1
48		1				45		1				55		1
48		1				45		1				55		1
48		1				48		1				55		1
50		1				48		1				55		1
50		1				48		1				55		1
50		1				48		1				55		1
50		1				48		1				55		1
50		1				48		1				55		1
50		1				48		1				55		1
50		1				48		1				55		1
50		1				48		1				55		1
50		1				48		1				55		1
50		1				48		1				55		1
50		1				48		1				55		1
50		1				48		1				55		1
50		1				48		1				55		1
50		1				48		1				57		1
50		1				50		1				57		1
50		1				50		1				57		1
50		1				50		1				57		1
50		1				50		1				57		1
50		1				50		1				57		1
50		1				50		1				57		1
50		1				50		1				57		1
50		1				50		1				57		1
50		1				50		1				57		1
52		1				50		1				57		1
52		1				50		1				57		1
52		1				50		1				57		1
52		1				50		1				57		1
52		1				50		1				57		1
52		1				52		1				57		1
52		1				52		1				57		1
52		1				17			1			57		1
52		1				17			1			59		1
52		1				20			1			59		1
52		1				20			1			59		1
52		1				20			1			59		1
52		1				20			1			59		1
52		1				20			1			59		1
52		1				20			1			59		1
52		1				20			1			59		1
52		1				20			1			59		1
55		1				21			1			59		1
55		1				21			1			59		1
55		1				21			1			59		1
55		1				21			1			59		1
55		1				21			1			59		1
55		1				21			1			59		1
55		1				21			1			59		1
55		1				21			1			59		1
55		1				22			1			59		1
55		1				22			1			59		1
55		1				22			1			62		1
55		1				22			1			62		1
55		1				22			1			62		1
55		1				22			1			62		1
55		1				22			1			62		1
55		1				22			1			62		1
55		1				22			1			62		1
57		1				22			1			3			1
59		1				22			1			8			1
62		1				22			1			8			1
62		1				22			1			9			1
3			1			22			1			20			1
3			1			22			1			21			1
5			1			22			1			22			1
6			1			22			1			22			1
9			1			22			1			22			1
13			1			22			1			22			1
14			1			22			1			22			1
14			1			23			1			22			1
21			1			23			1			22			1
21			1			23			1			24			1
22			1			23			1			24			1
23			1			23			1			24			1
27			1			23			1			27			1
27			1			23			1			27			1
27			1			23			1			27			1
27			1			23			1			27			1
27			1			23			1			27			1
27			1			23			1			29			1
27			1			23			1			29			1
27			1			23			1			29			1
27			1			23			1			29			1
29			1			23			1			29			1
29			1			23			1			31			1
29			1			23			1			31			1
29			1			23			1			31			1
29			1			23			1			34			1
29			1			23			1			31			1
29			1			23			1			31			1
29			1			23			1			31			1
29			1			23			1			31			1
29			1			23			1			31			1
29			1			23			1			31			1
31			1			23			1			31			1
31			1			23			1			36			1
31			1			23			1			36			1
31			1			24			1			36			1
31			1			24			1			36			1
31			1			24			1			36			1
31			1			24			1			36			1
31			1			24			1			36			1
31			1			24			1			36			1
31			1			24			1			36			1
31			1			24			1			36			1
31			1			24			1			36			1
31			1			24			1			36			1
31			1			24			1			36			1
31			1			24			1			36			1
34			1			24			1			36			1
34			1			24			1			36			1
34			1			24			1			36			1
34			1			24			1			36			1
34			1			24			1			36			1
34			1			24			1			36			1
34			1			24			1			36			1
34			1			24			1			36			1
34			1			27			1			36			1
34			1			27			1			36			1
34			1			27			1			36			1
34			1			27			1			36			1
34			1			27			1			36			1
34			1			27			1			36			1
34			1			27			1			36			1
34			1			27			1			36			1
34			1			27			1			36			1
34			1			27			1			38			1
34			1			27			1			38			1
36			1			27			1			38			1
36			1			27			1			38			1
36			1			27			1			38			1
36			1			27			1			38			1
36			1			27			1			38			1
36			1			27			1			38			1
36			1			27			1			38			1
36			1			27			1			38			1
36			1			27			1			38			1
36			1			27			1			38			1
36			1			27			1			38			1
38			1			27			1			38			1
38			1			27			1			38			1
38			1			27			1			38			1
38			1			27			1			38			1
38			1			27			1			38			1
38			1			27			1			38			1
38			1			27			1			38			1
38			1			27			1			38			1
38			1			27			1			38			1
38			1			27			1			38			1
38			1			27			1			38			1
38			1			27			1			38			1
38			1			27			1			38			1
38			1			27			1			38			1
38			1			27			1			41			1
38			1			27			1			41			1
38			1			27			1			41			1
38			1			27			1			41			1
38			1			27			1			41			1
38			1			27			1			41			1
41			1			27			1			41			1
41			1			27			1			41			1
41			1			27			1			41			1
41			1			27			1			41			1
41			1			27			1			41			1
41			1			27			1			41			1
41			1			27			1			41			1
41			1			27			1			41			1
41			1			27			1			41			1
41			1			27			1			41			1
41			1			27			1			41			1
41			1			27			1			41			1
41			1			27			1			41			1
41			1			27			1			41			1
41			1			27			1			41			1
41			1			27			1			41			1
41			1			27			1			41			1
41			1			27			1			41			1
41			1			27			1			41			1
41			1			27			1			41			1
41			1			27			1			41			1
41			1			27			1			41			1
43			1			27			1			41			1
43			1			27			1			41			1
43			1			27			1			41			1
43			1			27			1			41			1
43			1			27			1			41			1
43			1			27			1			41			1
43			1			29			1			41			1
43			1			29			1			41			1
43			1			29			1			41			1
43			1			29			1			41			1
43			1			29			1			41			1
43			1			29			1			41			1
43			1			29			1			41			1
43			1			29			1			41			1
43			1			29			1			41			1
43			1			29			1			41			1
43			1			29			1			41			1
43			1			29			1			41			1
43			1			29			1			41			1
43			1			29			1			41			1
43			1			29			1			41			1
43			1			29			1			41			1
43			1			29			1			41			1
43			1			29			1			41			1
43			1			29			1			41			1
45			1			29			1			41			1
45			1			29			1			41			1
45			1			29			1			41			1
45			1			29			1			41			1
45			1			29			1			41			1
45			1			31			1			41			1
45			1			31			1			41			1
45			1			31			1			41			1
45			1			31			1			41			1
45			1			31			1			41			1
45			1			31			1			41			1
45			1			31			1			41			1
45			1			31			1			41			1
45			1			31			1			41			1
45			1			31			1			41			1
45			1			31			1			41			1
45			1			31			1			41			1
45			1			31			1			41			1
45			1			31			1			43			1
45			1			31			1			43			1
45			1			31			1			43			1
45			1			31			1			43			1
48			1			31			1			43			1
48			1			31			1			43			1
48			1			31			1			43			1
48			1			31			1			43			1
48			1			31			1			43			1
48			1			31			1			43			1
48			1			31			1			43			1
48			1			31			1			43			1
48			1			31			1			43			1
48			1			31			1			43			1
48			1			31			1			43			1
48			1			31			1			43			1
48			1			31			1			43			1
48			1			31			1			43			1
48			1			31			1			43			1
48			1			31			1			43			1
48			1			31			1			43			1
48			1			31			1			43			1
48			1			31			1			43			1
48			1			31			1			43			1
48			1			31			1			43			1
48			1			31			1			43			1
48			1			31			1			43			1
48			1			31			1			43			1
48			1			34			1			43			1
48			1			34			1			45			1
48			1			34			1			45			1
48			1			34			1			45			1
48			1			34			1			45			1
48			1			34			1			45			1
48			1			36			1			45			1
48			1			36			1			45			1
48			1			36			1			45			1
48			1			36			1			45			1
48			1			45			1			45			1
48			1			3				1		45			1
48			1			6				1		45			1
48			1			7				1		45			1
48			1			9				1		45			1
48			1			14				1		45			1
48			1			14				1		45			1
48			1			17				1		48			1
48			1			20				1		48			1
48			1			20				1		48			1
48			1			20				1		48			1
48			1			20				1		48			1
48			1			20				1		48			1
48			1			20				1		48			1
48			1			21				1		48			1
48			1			21				1		48			1
48			1			21				1		48			1
48			1			21				1		48			1
48			1			21				1		48			1
48			1			21				1		48			1
48			1			21				1		48			1
48			1			21				1		48			1
48			1			21				1		48			1
48			1			22				1		48			1
48			1			22				1		48			1
50			1			22				1		48			1
50			1			22				1		48			1
50			1			22				1		48			1
50			1			22				1		48			1
50			1			22				1		48			1
50			1			22				1		50			1
50			1			22				1		50			1
50			1			22				1		50			1
50			1			22				1		50			1
50			1			22				1		50			1
50			1			22				1		50			1
50			1			22				1		50			1
50			1			22				1		50			1
50			1			22				1		50			1
50			1			22				1		50			1
50			1			22				1		50			1
50			1			22				1		52			1
50			1			22				1		52			1
50			1			22				1		52			1
50			1			23				1		52			1
50			1			23				1		52			1
52			1			23				1		52			1
52			1			23				1		55			1
52			1			23				1		55			1
52			1			23				1		55			1
52			1			23				1		55			1
52			1			23				1		3				1
52			1			23				1		7				1
52			1			23				1		8				1
52			1			23				1		9				1
52			1			23				1		9				1
52			1			23				1		10				1
52			1			23				1		13				1
52			1			23				1		13				1
52			1			23				1		15				1
52			1			23				1		16				1
52			1			23				1		20				1
52			1			23				1		21				1
52			1			23				1		22				1
52			1			23				1		22				1
52			1			23				1		23				1
52			1			23				1		23				1
52			1			23				1		23				1
55			1			23				1		23				1
55			1			23				1		23				1
55			1			23				1		23				1
55			1			23				1		24				1
55			1			23				1		27				1
55			1			23				1		27				1
55			1			23				1		27				1
55			1			23				1		27				1
55			1			24				1		27				1
57			1			24				1		27				1
57			1			24				1		27				1
57			1			24				1		27				1
59			1			24				1		27				1
62			1			24				1		27				1
62			1			24				1		27				1
62			1			24				1		27				1
3				1		24				1		27				1
3				1		24				1		27				1
5				1		24				1		27				1
6				1		24				1		27				1
7				1		24				1		27				1
20				1		24				1		27				1
21				1		24				1		27				1
22				1		24				1		27				1
22				1		24				1		27				1
23				1		24				1		27				1
23				1		24				1		27				1
24				1		24				1		27				1
27				1		24				1		27				1
27				1		24				1		29				1
27				1		24				1		29				1
27				1		24				1		29				1
27				1		27				1		29				1
27				1		27				1		29				1
27				1		27				1		29				1
27				1		27				1		29				1
27				1		27				1		29				1
29				1		27				1		29				1
29				1		27				1		29				1
29				1		27				1		29				1
29				1		27				1		29				1
29				1		27				1		29				1
31				1		27				1		29				1
31				1		27				1		31				1
31				1		27				1		31				1
31				1		27				1		31				1
31				1		27				1		31				1
34				1		27				1		31				1
34				1		27				1		31				1
34				1		27				1		31				1
34				1		27				1		31				1
34				1		27				1		31				1
34				1		27				1		31				1
34				1		27				1		31				1
34				1		27				1		31				1
34				1		27				1		31				1
34				1		27				1		31				1
34				1		27				1		31				1
34				1		27				1		31				1
34				1		27				1		31				1
34				1		27				1		31				1
34				1		27				1		31				1
36				1		27				1		31				1
36				1		27				1		31				1
36				1		27				1		31				1
36				1		27				1		31				1
36				1		27				1		31				1
36				1		27				1		31				1
36				1		27				1		31				1
36				1		27				1		31				1
36				1		27				1		31				1
36				1		27				1		31				1
36				1		27				1		34				1
38				1		27				1		34				1
38				1		27				1		34				1
38				1		27				1		34				1
38				1		27				1		34				1
38				1		27				1		34				1
38				1		27				1		34				1
38				1		27				1		34				1
38				1		27				1		34				1
38				1		27				1		34				1
38				1		27				1		34				1
38				1		27				1		34				1
38				1		27				1		34				1
38				1		27				1		34				1
38				1		27				1		34				1
38				1		27				1		34				1
38				1		27				1		34				1
38				1		27				1		34				1
38				1		27				1		34				1
38				1		27				1		34				1
38				1		27				1		34				1
41				1		27				1		34				1
41				1		27				1		34				1
41				1		27				1		34				1
41				1		27				1		34				1
41				1		27				1		34				1
41				1		27				1		34				1
41				1		27				1		34				1
41				1		27				1		34				1
41				1		27				1		34				1
41				1		27				1		34				1
41				1		29				1		34				1
41				1		29				1		34				1
41				1		29				1		34				1
41				1		29				1		34				1
41				1		29				1		34				1
41				1		29				1		34				1
41				1		29				1		34				1
41				1		29				1		34				1
41				1		29				1		34				1
41				1		29				1		34				1
41				1		29				1		34				1
41				1		29				1		34				1
41				1		29				1		36				1
41				1		29				1		36				1
41				1		29				1		36				1
41				1		29				1		36				1
43				1		29				1		36				1
43				1		29				1		36				1
43				1		29				1		36				1
43				1		29				1		36				1
43				1		29				1		36				1
43				1		29				1		36				1
43				1		31				1		36				1
43				1		31				1		36				1
43				1		31				1		36				1
43				1		31				1		36				1
43				1		31				1		36				1
43				1		31				1		36				1
43				1		31				1		36				1
43				1		31				1		36				1
43				1		31				1		36				1
43				1		31				1		36				1
43				1		31				1		36				1
43				1		31				1		36				1
43				1		31				1		36				1
43				1		31				1		36				1
43				1		31				1		36				1
43				1		31				1		36				1
43				1		31				1		36				1
43				1		31				1		36				1
43				1		31				1		36				1
43				1		31				1		36				1
43				1		31				1		36				1
43				1		31				1		36				1
43				1		31				1		36				1
45				1		31				1		36				1
45				1		31				1		36				1
45				1		31				1		36				1
45				1		31				1		36				1
45				1		31				1		36				1
45				1		31				1		36				1
45				1		34				1		36				1
45				1		34				1		36				1
45				1		34				1		36				1
45				1		34				1		36				1
45				1		34				1		36				1
45				1		34				1		36				1
45				1		34				1		36				1
45				1		36				1		36				1
45				1		36				1		36				1
45				1		48				1		36				1
45				1								36				1
45				1								36				1
45				1								36				1
45				1								36				1
48				1								36				1
48				1								36				1
48				1								36				1
48				1								36				1
48				1								36				1
48				1								36				1
48				1								36				1
48				1								36				1
48				1								36				1
48				1								36				1
48				1								36				1
48				1								36				1
48				1								36				1
48				1								36				1
48				1								38				1
48				1								38				1
48				1								38				1
48				1								38				1
48				1								38				1
48				1								38				1
48				1								38				1
48				1								38				1
48				1								38				1
48				1								38				1
48				1								38				1
48				1								38				1
48				1								38				1
48				1								38				1
48				1								38				1
48				1								38				1
48				1								38				1
48				1								38				1
48				1								38				1
48				1								38				1
48				1								38				1
48				1								38				1
48				1								38				1
48				1								38				1
48				1								38				1
48				1								38				1
48				1								38				1
48				1								38				1
48				1								38				1
48				1								38				1
48				1								38				1
48				1								38				1
48				1								38				1
48				1								38				1
48				1								41				1
50				1								41				1
50				1								41				1
50				1								41				1
50				1								41				1
50				1								41				1
50				1								41				1
50				1								41				1
50				1								41				1
50				1								41				1
50				1								41				1
50				1								41				1
50				1								41				1
50				1								41				1
50				1								41				1
50				1								41				1
50				1								41				1
50				1								41				1
50				1								41				1
50				1								41				1
50				1								41				1
50				1								41				1
50				1								41				1
50				1								41				1
50				1								41				1
50				1								41				1
50				1								41				1
50				1								41				1
50				1								41				1
50				1								43				1
50				1								43				1
50				1								43				1
50				1								43				1
52				1								43				1
52				1								43				1
52				1								43				1
52				1								43				1
52				1								43				1
52				1								43				1
52				1								45				1
52				1								45				1
52				1								45				1
52				1								45				1
52				1								45				1
52				1								48				1
52				1								48				1
52				1								48				1
52				1
52				1
52				1
52				1
52				1
52				1
52				1
52				1
52				1
52				1
55				1
55				1
55				1
55				1
55				1
55				1
55				1
55				1
55				1
55				1
55				1
55				1
55				1
55				1
55				1
55				1
55				1
55				1
57				1
59				1
59				1
59				1
59				1
59				1
59				1

## Sheet: Figure 4
F	Figure 4A							Figure 4B
	Age (days)	w1118;SCA2Q117;SCA2Q117 ♀︎	w1118;Sqh>dSesnWT♀︎	Sqh>SCA2Q117;SCA2Q117♀︎	Sqh>SCA2Q117;dSesnWT/SCA2Q117♀︎			Age (days)	w1118;SCA2Q117;SQA2Q117 ♀					w1118;Sqh>dSesnWT♀					Sqh>SCA2Q117;SCA2Q117 ♀					Sqh>SCA2Q117;dSesnWT/SCA2Q117♀
	40	1						5	1044.66	976.349	964.157	949.179	899.338	1134.6	1039.77	1035.4	990.523	855.484	754.2	730.466	689.43	684.567	674.341	1035.52	979.678	935.976	933.723	908.861
	44	1						10	898.487	898.095	884.629	880.287	876.646	830.119	820.309	816.378	812.752	801.872	640.741	628.013	626.28	616.628	609.632	866.638	855.484	832.195	820.309	793.317
	47	1						13	860.568	852.31	851.013	842.887	832.82	793.317	792.77	788.257	782.796	782.54	599.097	583.673	583.548	583.501	577.987	788.401	788.257	787.787	782.796	776.882
	47	1						18	819.439	797.195	793.909	789.471	784.885	773.518	759.828	752.697	751.092	750.192	573.453	570.818	568.326	560.711	546.204	773.518	756.815	746.315	742.767	730.934
	47	1						21	773.63	772.318	771.172	771.159	766.253	742.767	740.231	737.382	731.501	723.182	544.317	543.773	540.354	536.886	518.923	714.464	679.268	678.071	674.601	669.42
	47	1						26	765.805	765.442	760.308	749.519	738.225	712.481	708.488	702.499	698.271	689.315	518.599	516.917	511.245	498.123	496.368	662.645	661.962	661.911	659.37	658.647
	49	1						29	708.42	706.995	691.204	690.449	681.024	674.601	673.255	669.42	668.364	663.876	494.029	493.645	486.08	482.984	481.653	640.477	636.5	629.418	628.615	626.549
	49	1						34	661.098	648.509	636.964	617.507	613.39	662.775	654.387	642.791	640.472	639.511	474.466	471.16	465.768	465.187	455.245	625.549	618.511	601.552	601.194	597.048
	51	1						37	611.596	606.471	581.69	574.684	573.733	635.297	635.093	611.764	604.429	593.19	450.423	449.446	440.7	437.383	430.863	594.367	588.402	586.752	584.85	583.451
	54	1						42	553.035	550.701	548.295	547.291	525.96	592.918	586.752	576.096	575.583	549.702	422.155	410.321	408.895	406.784	402.013	583.098	583.065	566.958	558.946	557.042
	54	1						45	520.456	520.37	515.924	512.428	505.142	475.264	455.823	452.611	451.066	446.035	399.542	395.191	391.932	389.576	388.696	552.325	541.456	540.026	528.127	522.58
	56	1						50	503.626	495.977	479.072	475.451	470.583	445.487	444.794	428.431	417.261	409.22	378.227	356.01	324.612	308.273	296.097	504.994	500.969	487.58	485.813	465.722
	58	1						53	466.006	463.111	461.466	444.025	438.092	400.941	357.613	340.481	337.477	336.57	295.069	290.027	289.675	289.369	278.161	464.217	455.93	450.998	449.972	437.444
	58	1						58	431.74	425.014	421.079	420.984	419.109	336.09	327.229	324.865	323.577	318.264	276.67	270.865	261.779	261.054	256.748	392.639	387.154	372.464	358.197	338.669
	61	1						61	417.825	392.459	390.919	370.636	361.114	311.427	300.325	286.091	266.775	264.955	251.138	246.738	236.058	218.438	212.252	331.805	296.227	283.833	266.768	263.094
	61	1						66	348.579	319.962	276.659	267.246	239.727	262.04	240.267	233.508	232.067	226.3	195.048	146.315	139.026	120.648	57.196	256.855	237.554	231.774	212.611	204.839
	61	1
	61	1
	61	1						Figure 4C
	63	1
	63	1
	63	1
	63	1
	63	1
	63	1
	63	1
	63	1
	63	1
	63	1
	63	1
	63	1
	65	1
	65	1
	65	1
	65	1
	68	1
	68	1
	68	1
	68	1
	68	1
	68	1
	68	1
	68	1
	68	1
	70	1
	70	1
	70	1
	70	1
	72	1
	72	1
	72	1
	72	1
	72	1
	72	1
	77	1
	77	1
	77	1
	77	1
	77	1
	77	1
	77	1
	77	1
	77	1
	77	1
	77	1
	77	1
	77	1
	77	1
	77	1
	77	1
	77	1
	77	1
	77	1
	77	1
	77	1
	79	1
	79	1
	79	1
	79	1
	79	1
	79	1
	79	1
	79	1
	79	1
	79	1
	79	1
	79	1
	79	1
	79	1
	79	1
	79	1
	79	1
	79	1
	79	1
	79	1
	79	1
	79	1
	79	1
	79	1
	79	1
	79	1
	79	1
	82	1
	82	1
	82	1
	82	1
	82	1
	82	1
	82	1
	82	1
	82	1
	82	1
	82	1
	82	1
	82	1
	82	1
	82	1
	82	1
	82	1
	82	1
	82	1
	82	1
	82	1
	82	1
	82	1
	82	1
	82	1
	84	1
	84	1
	84	1
	84	1
	84	1
	84	1
	84	1
	84	1
	84	1
	84	1
	84	1
	84	1
	84	1
	84	1
	84	1
	84	1
	84	1
	84	1
	84	1
	84	1
	84	1
	84	1
	84	1
	86	1
	86	1
	86	1
	86	1
	86	1
	86	1
	86	1
	86	1
	86	1
	86	1
	86	1
	86	1
	86	1
	86	1
	89	1
	89	1
	89	1
	89	1
	89	1
	89	1
	89	1
	91	1
	91	1
	91	1
	91	1
	91	1
	91	1
	91	1
	91	1
	91	1
	91	1
	91	1
	93	1
	93	1
	93	1
	93	1
	93	1
	93	1
	93	1
	93	1
	96	1
	96	1
	96	1
	96	1
	96	1
	96	1
	96	1
	98	1
	98	1
	98	1
	98	1
	98	1
	100	1
	9		1
	12		1
	12		1
	12		1
	12		1
	12		1
	28		1
	40		1
	42		1
	47		1
	54		1
	54		1
	61		1
	63		1
	65		1
	65		1
	68		1
	68		1
	68		1
	68		1
	68		1
	68		1
	70		1
	70		1
	70		1
	70		1
	70		1
	70		1
	70		1
	70		1
	70		1
	70		1
	70		1
	70		1
	70		1
	70		1
	70		1
	70		1
	70		1
	70		1
	70		1
	70		1
	70		1
	70		1
	70		1
	70		1
	70		1
	70		1
	72		1
	72		1
	72		1
	72		1
	72		1
	75		1
	75		1
	77		1
	77		1
	77		1
	77		1
	77		1
	77		1
	77		1
	77		1
	77		1
	77		1
	77		1
	77		1
	77		1
	77		1
	77		1
	79		1
	79		1
	79		1
	79		1
	79		1
	79		1
	79		1
	79		1
	79		1
	79		1
	84		1
	84		1
	84		1
	84		1
	84		1
	84		1
	84		1
	84		1
	84		1
	84		1
	84		1
	84		1
	84		1
	84		1
	84		1
	84		1
	84		1
	84		1
	84		1
	84		1
	84		1
	84		1
	84		1
	84		1
	84		1
	84		1
	84		1
	84		1
	84		1
	84		1
	84		1
	86		1
	86		1
	86		1
	86		1
	86		1
	86		1
	86		1
	86		1
	86		1
	86		1
	86		1
	89		1
	89		1
	89		1
	89		1
	89		1
	89		1
	91		1
	91		1
	93		1
	93		1
	5			1
	7			1
	7			1
	7			1
	9			1
	14			1
	19			1
	23			1
	33			1
	37			1
	40			1
	40			1
	42			1
	42			1
	42			1
	42			1
	44			1
	44			1
	44			1
	44			1
	44			1
	44			1
	44			1
	44			1
	44			1
	47			1
	47			1
	47			1
	47			1
	47			1
	47			1
	47			1
	47			1
	47			1
	47			1
	47			1
	49			1
	49			1
	49			1
	49			1
	49			1
	49			1
	49			1
	49			1
	51			1
	51			1
	51			1
	51			1
	51			1
	51			1
	51			1
	51			1
	51			1
	51			1
	51			1
	51			1
	51			1
	51			1
	54			1
	54			1
	54			1
	54			1
	54			1
	54			1
	54			1
	54			1
	54			1
	54			1
	54			1
	54			1
	54			1
	54			1
	54			1
	54			1
	54			1
	54			1
	56			1
	56			1
	56			1
	56			1
	56			1
	56			1
	56			1
	56			1
	56			1
	56			1
	56			1
	56			1
	56			1
	56			1
	56			1
	56			1
	56			1
	56			1
	56			1
	56			1
	56			1
	56			1
	56			1
	56			1
	56			1
	56			1
	56			1
	56			1
	56			1
	56			1
	56			1
	56			1
	56			1
	56			1
	56			1
	56			1
	56			1
	56			1
	56			1
	56			1
	56			1
	56			1
	56			1
	56			1
	56			1
	56			1
	56			1
	56			1
	56			1
	58			1
	58			1
	58			1
	58			1
	58			1
	58			1
	58			1
	58			1
	58			1
	58			1
	58			1
	58			1
	58			1
	58			1
	58			1
	58			1
	58			1
	58			1
	58			1
	58			1
	58			1
	58			1
	58			1
	58			1
	58			1
	58			1
	58			1
	58			1
	58			1
	58			1
	58			1
	58			1
	58			1
	58			1
	58			1
	58			1
	58			1
	58			1
	58			1
	58			1
	58			1
	58			1
	58			1
	58			1
	58			1
	58			1
	61			1
	61			1
	61			1
	61			1
	61			1
	61			1
	61			1
	61			1
	61			1
	61			1
	61			1
	61			1
	61			1
	61			1
	61			1
	61			1
	61			1
	61			1
	61			1
	61			1
	61			1
	61			1
	61			1
	61			1
	61			1
	61			1
	61			1
	61			1
	61			1
	61			1
	61			1
	61			1
	61			1
	61			1
	61			1
	61			1
	61			1
	61			1
	61			1
	61			1
	61			1
	61			1
	61			1
	61			1
	61			1
	61			1
	61			1
	61			1
	61			1
	61			1
	61			1
	61			1
	61			1
	61			1
	61			1
	63			1
	63			1
	63			1
	63			1
	63			1
	63			1
	63			1
	63			1
	63			1
	63			1
	63			1
	63			1
	63			1
	63			1
	63			1
	63			1
	63			1
	63			1
	63			1
	63			1
	63			1
	63			1
	63			1
	63			1
	63			1
	65			1
	65			1
	65			1
	65			1
	65			1
	65			1
	65			1
	65			1
	65			1
	65			1
	65			1
	65			1
	65			1
	65			1
	65			1
	65			1
	65			1
	65			1
	65			1
	65			1
	68			1
	68			1
	68			1
	68			1
	68			1
	68			1
	68			1
	68			1
	68			1
	68			1
	68			1
	68			1
	68			1
	70			1
	70			1
	70			1
	70			1
	70			1
	70			1
	70			1
	70			1
	70			1
	72			1
	72			1
	72			1
	7				1
	7				1
	9				1
	9				1
	12				1
	12				1
	16				1
	16				1
	19				1
	26				1
	40				1
	44				1
	44				1
	44				1
	47				1
	47				1
	47				1
	47				1
	47				1
	47				1
	47				1
	47				1
	47				1
	49				1
	49				1
	49				1
	49				1
	49				1
	49				1
	49				1
	49				1
	51				1
	51				1
	51				1
	51				1
	51				1
	51				1
	54				1
	54				1
	54				1
	54				1
	54				1
	54				1
	54				1
	54				1
	54				1
	54				1
	54				1
	56				1
	56				1
	56				1
	58				1
	58				1
	58				1
	58				1
	58				1
	58				1
	58				1
	58				1
	58				1
	58				1
	58				1
	61				1
	61				1
	61				1
	61				1
	61				1
	61				1
	61				1
	61				1
	61				1
	61				1
	61				1
	63				1
	63				1
	63				1
	63				1
	63				1
	63				1
	63				1
	63				1
	63				1
	63				1
	63				1
	63				1
	63				1
	63				1
	63				1
	63				1
	63				1
	63				1
	63				1
	65				1
	65				1
	65				1
	65				1
	65				1
	65				1
	65				1
	65				1
	65				1
	65				1
	65				1
	65				1
	65				1
	65				1
	68				1
	68				1
	68				1
	68				1
	68				1
	68				1
	68				1
	68				1
	68				1
	68				1
	68				1
	68				1
	68				1
	68				1
	68				1
	68				1
	68				1
	68				1
	68				1
	68				1
	68				1
	68				1
	68				1
	68				1
	68				1
	68				1
	68				1
	68				1
	68				1
	68				1
	68				1
	68				1
	68				1
	68				1
	70				1
	70				1
	70				1
	70				1
	70				1
	70				1
	70				1
	70				1
	70				1
	72				1
	72				1
	72				1
	72				1
	72				1
	72				1
	72				1
	75				1
	75				1
	75				1
	77				1
Figure 4D							Figure 4E
Age (days)	w1118;SCA2Q117;SCA2Q117 ♂︎	w1118;Sqh>dSesnWT♂︎	Sqh>SCA2Q117;SCA2Q117♂︎	Sqh>SCA2Q117;dSesnWT/SCA2Q117♂︎			Age (days)	w1118;SCA2Q117;SQA2Q117 ♂					w1118;Sqh>dSesnWT♂					Sqh>SCA2Q117;SCA2Q117 ♂					Sqh>SCA2Q117;dSesnWT/SCA2Q117♂
5	1						5	1256.99	1232.01	1213.69	1188.77	1147.09	1080.47	997.843	968.211	935.182	928.038	842.358	781.146	761.735	743.05	734.255	1044.54	1020.49	1004.99	998.291	945.801
7	1						10	1126.54	1075.39	1053.26	1052.34	1041.48	921.792	914.647	898.055	897.081	891.987	722.607	711.788	705.553	693.506	690.488	903.443	875.736	874.658	864.616	864.576
7	1						13	1025.45	1020.36	994.515	973.023	972.429	887.119	877.212	868.893	842.688	840.54	680.762	674.148	670.93	668.282	657.136	859.945	859.839	859.115	859.086	857.778
12	1						18	968.401	943.24	941.807	934.02	932.74	835.515	835.402	819.901	817.594	814.486	641.457	634.948	626.59	623.764	623.747	853.094	852.054	849.479	843.993	825.081
19	1						21	928.541	923.287	913.218	897.688	892.325	804.123	803.023	773.148	757.194	752.328	611.557	609.057	606.083	605.9	600.365	816.218	791.458	787.575	757.901	752.394
19	1						26	879.286	875.79	874.511	874.11	864.397	731.871	729.296	728.921	728.263	716.869	599.921	590.623	582.832	574.213	567.577	745.731	742.189	736.314	728.186	723.338
21	1						29	854.238	836.529	822.768	818.141	796.608	716.857	714.801	709.986	706.485	700.229	567.226	559.393	554.676	548.522	540.857	715.125	710.246	708.875	708.769	707.092
28	1						34	790.638	748.006	746.901	736.426	729.292	689.371	682.799	676.175	671.546	654.009	538.323	537.689	521.707	521.383	520.635	705.83	701.854	679.113	678.795	667.024
33	1						37	693.369	693.155	691.644	689.233	683.324	641.135	639.19	637.444	634.005	632.695	517.75	506.77	505.188	497.916	493.802	654.63	649.387	639.11	634.376	629.602
37	1						42	676.731	673.221	671.723	662.509	659.603	613.47	608.139	604.875	599.873	598.099	489.136	486.025	483.133	479.635	478.635	622.789	621.424	616.612	613.366	608.56
37	1						45	654.601	654.593	652.273	650.202	649.25	586.804	581.352	581.217	561.987	556.612	473.69	467.474	466.842	436.541	423.171	604.177	598.088	593.47	588.873	588.47
40	1						50	639.486	637.479	609.105	597.57	593.273	549.422	544.807	539.987	533.488	516.805	423.058	402.728	397.308	387.24	378.831	587.141	582.829	574.986	571.844	525.72
40	1						53	580.911	517.456	512.313	510.683	500.174	513.62	503.951	498.609	496.749	471.438	369.968	369.827	363.718	346.21	340.786	521.284	520.804	505.158	490.512	483.505
40	1						58	498.731	498.521	483.183	452.228	447.792	457.216	444.944	430.078	427.282	414.476	326.579	325.875	323.003	321	317.472	479.043	451.285	443.05	430.827	412.619
42	1						61	446.643	440.746	428.874	414.034	396.832	402.256	399.421	379.902	338.976	333.48	303.291	280.923	276.011	250.668	248.005	405.835	405.487	388.18	347.804	334.029
42	1						66	392.354	376.926	367.716	337.384	260.358	329.308	301.112	275.215	274.854	237.841	218.883	216.501	199.943	164.556	147.315	319.616	313.588	304.897	242.703	230.337
42	1
44	1
44	1						Figure 4F
44	1
44	1
47	1
47	1
47	1
47	1
47	1
47	1
47	1
49	1
49	1
51	1
51	1
51	1
51	1
54	1
54	1
54	1
54	1
56	1
56	1
56	1
56	1
56	1
58	1
58	1
58	1
58	1
58	1
58	1
58	1
61	1
61	1
61	1
61	1
61	1
61	1
61	1
61	1
61	1
61	1
61	1
61	1
61	1
63	1
63	1
63	1
63	1
63	1
63	1
63	1
65	1
65	1
65	1
65	1
65	1
68	1
68	1
68	1
68	1
68	1
68	1
68	1
68	1
68	1
68	1
68	1
70	1
70	1
70	1
70	1
70	1
70	1
70	1
72	1
72	1
72	1
72	1
77	1
77	1
77	1
77	1
77	1
77	1
77	1
77	1
77	1
77	1
77	1
77	1
77	1
77	1
79	1
79	1
79	1
79	1
82	1
82	1
82	1
82	1
82	1
82	1
82	1
82	1
82	1
82	1
82	1
82	1
82	1
82	1
82	1
82	1
84	1
84	1
84	1
84	1
86	1
86	1
86	1
86	1
86	1
86	1
86	1
86	1
86	1
89	1
89	1
89	1
89	1
89	1
89	1
89	1
89	1
89	1
89	1
89	1
89	1
89	1
89	1
89	1
91	1
91	1
91	1
91	1
91	1
91	1
91	1
91	1
91	1
91	1
93	1
93	1
93	1
93	1
96	1
96	1
96	1
96	1
96	1
96	1
96	1
96	1
96	1
98	1
98	1
100	1
100	1
100	1
7		1
12		1
12		1
12		1
12		1
12		1
21		1
21		1
21		1
21		1
35		1
37		1
37		1
40		1
40		1
42		1
42		1
44		1
44		1
44		1
47		1
47		1
47		1
47		1
47		1
49		1
49		1
49		1
49		1
51		1
51		1
51		1
51		1
51		1
54		1
54		1
56		1
56		1
56		1
56		1
56		1
58		1
58		1
58		1
58		1
61		1
61		1
61		1
61		1
61		1
61		1
61		1
61		1
61		1
63		1
63		1
63		1
65		1
65		1
65		1
65		1
65		1
68		1
68		1
68		1
68		1
68		1
68		1
68		1
68		1
68		1
70		1
70		1
70		1
70		1
70		1
70		1
70		1
72		1
72		1
72		1
72		1
72		1
72		1
75		1
75		1
75		1
75		1
75		1
75		1
75		1
75		1
75		1
75		1
77		1
79		1
79		1
79		1
84		1
84		1
84		1
84		1
84		1
84		1
84		1
86		1
86		1
86		1
86		1
86		1
89		1
89		1
91		1
91		1
93		1
5			1
5			1
5			1
7			1
9			1
9			1
12			1
14			1
16			1
19			1
21			1
23			1
26			1
26			1
28			1
28			1
28			1
28			1
30			1
30			1
33			1
35			1
37			1
40			1
40			1
40			1
42			1
42			1
42			1
42			1
44			1
47			1
47			1
47			1
47			1
47			1
49			1
49			1
49			1
51			1
51			1
51			1
51			1
51			1
51			1
51			1
51			1
51			1
51			1
51			1
51			1
54			1
54			1
54			1
54			1
54			1
54			1
54			1
54			1
54			1
54			1
54			1
54			1
54			1
54			1
54			1
54			1
54			1
54			1
54			1
54			1
54			1
54			1
54			1
54			1
54			1
54			1
56			1
56			1
56			1
56			1
56			1
56			1
56			1
56			1
56			1
56			1
56			1
56			1
56			1
56			1
56			1
56			1
56			1
56			1
56			1
56			1
56			1
56			1
56			1
56			1
58			1
58			1
58			1
58			1
58			1
58			1
58			1
58			1
58			1
58			1
58			1
58			1
58			1
58			1
58			1
58			1
58			1
58			1
58			1
58			1
58			1
58			1
58			1
58			1
58			1
58			1
58			1
58			1
58			1
58			1
58			1
61			1
61			1
61			1
61			1
61			1
61			1
61			1
61			1
61			1
61			1
61			1
61			1
61			1
61			1
61			1
61			1
61			1
61			1
61			1
61			1
61			1
61			1
61			1
61			1
61			1
61			1
61			1
61			1
61			1
61			1
61			1
61			1
61			1
61			1
61			1
61			1
61			1
61			1
63			1
63			1
63			1
63			1
63			1
63			1
63			1
63			1
63			1
63			1
63			1
63			1
63			1
63			1
63			1
63			1
63			1
63			1
63			1
63			1
63			1
63			1
63			1
63			1
63			1
63			1
63			1
63			1
63			1
63			1
63			1
63			1
63			1
63			1
63			1
63			1
63			1
63			1
63			1
63			1
63			1
63			1
65			1
65			1
65			1
65			1
65			1
65			1
65			1
65			1
65			1
65			1
65			1
65			1
65			1
65			1
68			1
68			1
68			1
68			1
68			1
68			1
68			1
68			1
68			1
68			1
68			1
68			1
68			1
68			1
68			1
68			1
68			1
68			1
68			1
68			1
68			1
70			1
70			1
70			1
70			1
70			1
70			1
70			1
70			1
70			1
70			1
70			1
70			1
70			1
72			1
72			1
72			1
72			1
72			1
72			1
72			1
72			1
72			1
72			1
72			1
72			1
72			1
72			1
77			1
77			1
77			1
77			1
77			1
77			1
77			1
77			1
77			1
77			1
77			1
77			1
77			1
77			1
77			1
77			1
77			1
77			1
77			1
77			1
77			1
77			1
77			1
77			1
77			1
77			1
77			1
77			1
77			1
77			1
79			1
79			1
79			1
79			1
79			1
79			1
79			1
82			1
82			1
7				1
9				1
12				1
12				1
12				1
12				1
12				1
14				1
16				1
19				1
26				1
28				1
33				1
35				1
40				1
40				1
42				1
51				1
54				1
54				1
54				1
56				1
56				1
56				1
56				1
56				1
58				1
58				1
58				1
58				1
58				1
58				1
58				1
61				1
61				1
61				1
61				1
61				1
61				1
61				1
63				1
63				1
63				1
63				1
63				1
63				1
63				1
63				1
63				1
63				1
63				1
63				1
63				1
63				1
63				1
63				1
65				1
65				1
65				1
65				1
65				1
65				1
65				1
65				1
65				1
65				1
65				1
65				1
65				1
68				1
68				1
68				1
68				1
68				1
68				1
68				1
68				1
70				1
70				1
70				1
70				1
70				1
70				1
70				1
70				1
70				1
70				1
70				1
70				1
72				1
72				1
72				1
72				1
72				1
72				1
72				1
72				1
72				1
72				1
72				1
72				1
75				1
75				1
75				1
75				1
75				1
75				1
75				1
75				1
75				1
75				1
77				1
77				1
77				1
77				1
77				1
77				1
77				1
77				1
79				1
79				1
79				1
79				1
84				1
84				1

## Sheet: Figure 5
Figure 5A							Figure 5B
Age (days)	w1118;SCA2Q117;SCA2Q117 ♀︎	w1118;Sqh>dSesnWT♀︎	Sqh>SCA2Q117;SCA2Q117♀︎	Sqh>SCA2Q117;dSesnWT/SCA2Q117♀︎	Sqh>SCA2Q117;dSesnCSSCA2Q117♀︎		Age (days)	w1118;SCA2Q117;SQA2Q117 ♀					w1118;Sqh>dSesnWT♀					Sqh>SCA2Q117;SCA2Q117 ♀					Sqh>SCA2Q117;dSesnWT/SCA2Q117♀					Sqh>SCA2Q117;dSesnCS/SCA2Q117♀
40	1						5	1044.66	976.349	964.157	949.179	899.338	1134.6	1039.77	1035.4	990.523	855.484	754.2	730.466	689.43	684.567	674.341	1035.52	979.678	935.976	933.723	908.861	927.645	847.557	840.348	834.657	824.382
44	1						10	898.487	898.095	884.629	880.287	876.646	830.119	820.309	816.378	812.752	801.872	640.741	628.013	626.28	616.628	609.632	866.638	855.484	832.195	820.309	793.317	804.451	798.359	798.265	791.427	787.736
47	1						13	860.568	852.31	851.013	842.887	832.82	793.317	792.77	788.257	782.796	782.54	599.097	583.673	583.548	583.501	577.987	788.401	788.257	787.787	782.796	776.882	738.201	737.425	734.849	727.115	727.085
47	1						18	819.439	797.195	793.909	789.471	784.885	773.518	759.828	752.697	751.092	750.192	573.453	570.818	568.326	560.711	546.204	773.518	756.815	746.315	742.767	730.934	715.895	699.508	690.501	688.989	684.667
47	1						21	773.63	772.318	771.172	771.159	766.253	742.767	740.231	737.382	731.501	723.182	544.317	543.773	540.354	536.886	518.923	714.464	679.268	678.071	674.601	669.42	667.226	659.76	647.323	645.846	643.89
47	1						26	765.805	765.442	760.308	749.519	738.225	712.481	708.488	702.499	698.271	689.315	518.599	516.917	511.245	498.123	496.368	662.645	661.962	661.911	659.37	658.647	642.543	635.401	627.454	623.678	622.289
49	1						29	708.42	706.995	691.204	690.449	681.024	674.601	673.255	669.42	668.364	663.876	494.029	493.645	486.08	482.984	481.653	640.477	636.5	629.418	628.615	626.549	620.137	614.189	613.874	600.502	596.514
49	1						34	661.098	648.509	636.964	617.507	613.39	662.775	654.387	642.791	640.472	639.511	474.466	471.16	465.768	465.187	455.245	625.549	618.511	601.552	601.194	597.048	596.235	592.773	592.333	574.611	572.196
51	1						37	611.596	606.471	581.69	574.684	573.733	635.297	635.093	611.764	604.429	593.19	450.423	449.446	440.7	437.383	430.863	594.367	588.402	586.752	584.85	583.451	568.288	553.444	539.374	539.058	533.781
54	1						42	553.035	550.701	548.295	547.291	525.96	592.918	586.752	576.096	575.583	549.702	422.155	410.321	408.895	406.784	402.013	583.098	583.065	566.958	558.946	557.042	521.781	519.907	516.308	513.456	510.98
54	1						45	520.456	520.37	515.924	512.428	505.142	475.264	455.823	452.611	451.066	446.035	399.542	395.191	391.932	389.576	388.696	552.325	541.456	540.026	528.127	522.58	510.715	504.392	502.728	485.398	477.13
56	1						50	503.626	495.977	479.072	475.451	470.583	445.487	444.794	428.431	417.261	409.22	378.227	356.01	324.612	308.273	296.097	504.994	500.969	487.58	485.813	465.722	472.73	466.616	458.831	440.541	430.983
58	1						53	466.006	463.111	461.466	444.025	438.092	400.941	357.613	340.481	337.477	336.57	295.069	290.027	289.675	289.369	278.161	464.217	455.93	450.998	449.972	437.444	410.58	407.981	389.645	372.96	370.955
58	1						58	431.74	425.014	421.079	420.984	419.109	336.09	327.229	324.865	323.577	318.264	276.67	270.865	261.779	261.054	256.748	392.639	387.154	372.464	358.197	338.669	355.66	343.188	324.343	316.33	315.518
61	1						61	417.825	392.459	390.919	370.636	361.114	311.427	300.325	286.091	266.775	264.955	251.138	246.738	236.058	218.438	212.252	331.805	296.227	283.833	266.768	263.094	306.717	292.223	282.738	274.188	269.772
61	1						66	348.579	319.962	276.659	267.246	239.727	262.04	240.267	233.508	232.067	226.3	195.048	146.315	139.026	120.648	57.196	256.855	237.554	231.774	212.611	204.839	259.814	255.993	211.93	195.597	158.869
61	1
61	1
61	1						Figure 5C
63	1
63	1
63	1
63	1
63	1
63	1
63	1
63	1
63	1
63	1
63	1
63	1
65	1
65	1
65	1
65	1
68	1
68	1
68	1
68	1
68	1
68	1
68	1
68	1
68	1
70	1
70	1
70	1
70	1
72	1
72	1
72	1
72	1
72	1
72	1
77	1
77	1
77	1
77	1
77	1
77	1
77	1
77	1
77	1
77	1
77	1
77	1
77	1
77	1
77	1
77	1
77	1
77	1
77	1
77	1
77	1
79	1
79	1
79	1
79	1
79	1
79	1
79	1
79	1
79	1
79	1
79	1
79	1
79	1
79	1
79	1
79	1
79	1
79	1
79	1
79	1
79	1
79	1
79	1
79	1
79	1
79	1
79	1
82	1
82	1
82	1
82	1
82	1
82	1
82	1
82	1
82	1
82	1
82	1
82	1
82	1
82	1
82	1
82	1
82	1
82	1
82	1
82	1
82	1
82	1
82	1
82	1
82	1
84	1
84	1
84	1
84	1
84	1
84	1
84	1
84	1
84	1
84	1
84	1
84	1
84	1
84	1
84	1
84	1
84	1
84	1
84	1
84	1
84	1
84	1
84	1
86	1
86	1
86	1
86	1
86	1
86	1
86	1
86	1
86	1
86	1
86	1
86	1
86	1
86	1
89	1
89	1
89	1
89	1
89	1
89	1
89	1
91	1
91	1
91	1
91	1
91	1
91	1
91	1
91	1
91	1
91	1
91	1
93	1
93	1
93	1
93	1
93	1
93	1
93	1
93	1
96	1
96	1
96	1
96	1
96	1
96	1
96	1
98	1
98	1
98	1
98	1
98	1
100	1
9		1
12		1
12		1
12		1
12		1
12		1
28		1
40		1
42		1
47		1
54		1
54		1
61		1
63		1
65		1
65		1
68		1
68		1
68		1
68		1
68		1
68		1
70		1
70		1
70		1
70		1
70		1
70		1
70		1
70		1
70		1
70		1
70		1
70		1
70		1
70		1
70		1
70		1
70		1
70		1
70		1
70		1
70		1
70		1
70		1
70		1
70		1
70		1
72		1
72		1
72		1
72		1
72		1
75		1
75		1
77		1
77		1
77		1
77		1
77		1
77		1
77		1
77		1
77		1
77		1
77		1
77		1
77		1
77		1
77		1
79		1
79		1
79		1
79		1
79		1
79		1
79		1
79		1
79		1
79		1
84		1
84		1
84		1
84		1
84		1
84		1
84		1
84		1
84		1
84		1
84		1
84		1
84		1
84		1
84		1
84		1
84		1
84		1
84		1
84		1
84		1
84		1
84		1
84		1
84		1
84		1
84		1
84		1
84		1
84		1
84		1
86		1
86		1
86		1
86		1
86		1
86		1
86		1
86		1
86		1
86		1
86		1
89		1
89		1
89		1
89		1
89		1
89		1
91		1
91		1
93		1
93		1
5			1
7			1
7			1
7			1
9			1
14			1
19			1
23			1
33			1
37			1
40			1
40			1
42			1
42			1
42			1
42			1
44			1
44			1
44			1
44			1
44			1
44			1
44			1
44			1
44			1
47			1
47			1
47			1
47			1
47			1
47			1
47			1
47			1
47			1
47			1
47			1
49			1
49			1
49			1
49			1
49			1
49			1
49			1
49			1
51			1
51			1
51			1
51			1
51			1
51			1
51			1
51			1
51			1
51			1
51			1
51			1
51			1
51			1
54			1
54			1
54			1
54			1
54			1
54			1
54			1
54			1
54			1
54			1
54			1
54			1
54			1
54			1
54			1
54			1
54			1
54			1
56			1
56			1
56			1
56			1
56			1
56			1
56			1
56			1
56			1
56			1
56			1
56			1
56			1
56			1
56			1
56			1
56			1
56			1
56			1
56			1
56			1
56			1
56			1
56			1
56			1
56			1
56			1
56			1
56			1
56			1
56			1
56			1
56			1
56			1
56			1
56			1
56			1
56			1
56			1
56			1
56			1
56			1
56			1
56			1
56			1
56			1
56			1
56			1
56			1
58			1
58			1
58			1
58			1
58			1
58			1
58			1
58			1
58			1
58			1
58			1
58			1
58			1
58			1
58			1
58			1
58			1
58			1
58			1
58			1
58			1
58			1
58			1
58			1
58			1
58			1
58			1
58			1
58			1
58			1
58			1
58			1
58			1
58			1
58			1
58			1
58			1
58			1
58			1
58			1
58			1
58			1
58			1
58			1
58			1
58			1
61			1
61			1
61			1
61			1
61			1
61			1
61			1
61			1
61			1
61			1
61			1
61			1
61			1
61			1
61			1
61			1
61			1
61			1
61			1
61			1
61			1
61			1
61			1
61			1
61			1
61			1
61			1
61			1
61			1
61			1
61			1
61			1
61			1
61			1
61			1
61			1
61			1
61			1
61			1
61			1
61			1
61			1
61			1
61			1
61			1
61			1
61			1
61			1
61			1
61			1
61			1
61			1
61			1
61			1
61			1
63			1
63			1
63			1
63			1
63			1
63			1
63			1
63			1
63			1
63			1
63			1
63			1
63			1
63			1
63			1
63			1
63			1
63			1
63			1
63			1
63			1
63			1
63			1
63			1
63			1
65			1
65			1
65			1
65			1
65			1
65			1
65			1
65			1
65			1
65			1
65			1
65			1
65			1
65			1
65			1
65			1
65			1
65			1
65			1
65			1
68			1
68			1
68			1
68			1
68			1
68			1
68			1
68			1
68			1
68			1
68			1
68			1
68			1
70			1
70			1
70			1
70			1
70			1
70			1
70			1
70			1
70			1
72			1
72			1
72			1
7				1
7				1
9				1
9				1
12				1
12				1
16				1
16				1
19				1
26				1
40				1
44				1
44				1
44				1
47				1
47				1
47				1
47				1
47				1
47				1
47				1
47				1
47				1
49				1
49				1
49				1
49				1
49				1
49				1
49				1
49				1
51				1
51				1
51				1
51				1
51				1
51				1
54				1
54				1
54				1
54				1
54				1
54				1
54				1
54				1
54				1
54				1
54				1
56				1
56				1
56				1
58				1
58				1
58				1
58				1
58				1
58				1
58				1
58				1
58				1
58				1
58				1
61				1
61				1
61				1
61				1
61				1
61				1
61				1
61				1
61				1
61				1
61				1
63				1
63				1
63				1
63				1
63				1
63				1
63				1
63				1
63				1
63				1
63				1
63				1
63				1
63				1
63				1
63				1
63				1
63				1
63				1
65				1
65				1
65				1
65				1
65				1
65				1
65				1
65				1
65				1
65				1
65				1
65				1
65				1
65				1
68				1
68				1
68				1
68				1
68				1
68				1
68				1
68				1
68				1
68				1
68				1
68				1
68				1
68				1
68				1
68				1
68				1
68				1
68				1
68				1
68				1
68				1
68				1
68				1
68				1
68				1
68				1
68				1
68				1
68				1
68				1
68				1
68				1
68				1
70				1
70				1
70				1
70				1
70				1
70				1
70				1
70				1
70				1
72				1
72				1
72				1
72				1
72				1
72				1
72				1
75				1
75				1
75				1
77				1
9					1
12					1
12					1
14					1
14					1
19					1
21					1
21					1
26					1
26					1
28					1
28					1
28					1
28					1
28					1
28					1
28					1
28					1
30					1
30					1
30					1
30					1
30					1
30					1
30					1
30					1
33					1
33					1
33					1
33					1
33					1
33					1
33					1
33					1
35					1
35					1
35					1
37					1
37					1
37					1
37					1
37					1
40					1
42					1
42					1
42					1
44					1
47					1
47					1
49					1
49					1
49					1
49					1
49					1
51					1
51					1
51					1
51					1
51					1
51					1
54					1
54					1
54					1
54					1
54					1
54					1
54					1
54					1
56					1
56					1
56					1
56					1
56					1
56					1
56					1
58					1
58					1
58					1
58					1
58					1
58					1
58					1
58					1
58					1
61					1
61					1
61					1
61					1
61					1
61					1
61					1
61					1
61					1
61					1
61					1
63					1
63					1
63					1
63					1
63					1
63					1
63					1
63					1
63					1
63					1
63					1
68					1
68					1
68					1
68					1
68					1
68					1
70					1
72					1
72					1
72					1
77					1
77					1
77					1
77					1
Figure 5D								Figure 5E
Age (days)	w1118;SCA2Q117;SCA2Q117 ♂︎	w1118;Sqh>dSesnWT♂︎	Sqh>SCA2Q117;SCA2Q117♂︎	Sqh>SCA2Q117;dSesnWT/SCA2Q117♂︎	Sqh>SCA2Q117;dSesnCSSCA2Q117♂︎			Age (days)	w1118;SCA2Q117;SQA2Q117 ♂					w1118;Sqh>dSesnWT♂					Sqh>SCA2Q117;SCA2Q117 ♂					Sqh>SCA2Q117;dSesnWT/SCA2Q117♂					Sqh>SCA2Q117;dSesnCS/SCA2Q117♂
5	1							5	1256.99	1232.01	1213.69	1188.77	1147.09	1080.47	997.843	968.211	935.182	928.038	842.358	781.146	761.735	743.05	734.255	1044.54	1020.49	1004.99	998.291	945.801	1004.21	996.788	959.677	953.943	947.32
7	1							10	1126.54	1075.39	1053.26	1052.34	1041.48	921.792	914.647	898.055	897.081	891.987	722.607	711.788	705.553	693.506	690.488	903.443	875.736	874.658	864.616	864.576	940.17	920.296	916.452	898.91	890.899
7	1							13	1025.45	1020.36	994.515	973.023	972.429	887.119	877.212	868.893	842.688	840.54	680.762	674.148	670.93	668.282	657.136	859.945	859.839	859.115	859.086	857.778	854.743	850.808	816.948	814.368	801.129
12	1							18	968.401	943.24	941.807	934.02	932.74	835.515	835.402	819.901	817.594	814.486	641.457	634.948	626.59	623.764	623.747	853.094	852.054	849.479	843.993	825.081	790.31	789.684	781.649	778.467	778.153
19	1							21	928.541	923.287	913.218	897.688	892.325	804.123	803.023	773.148	757.194	752.328	611.557	609.057	606.083	605.9	600.365	816.218	791.458	787.575	757.901	752.394	772.834	768.945	762.431	759.168	758.782
19	1							26	879.286	875.79	874.511	874.11	864.397	731.871	729.296	728.921	728.263	716.869	599.921	590.623	582.832	574.213	567.577	745.731	742.189	736.314	728.186	723.338	758.325	756.473	755.587	750.28	749.767
21	1							29	854.238	836.529	822.768	818.141	796.608	716.857	714.801	709.986	706.485	700.229	567.226	559.393	554.676	548.522	540.857	715.125	710.246	708.875	708.769	707.092	735.872	727.617	718.889	716.317	686.563
28	1							34	790.638	748.006	746.901	736.426	729.292	689.371	682.799	676.175	671.546	654.009	538.323	537.689	521.707	521.383	520.635	705.83	701.854	679.113	678.795	667.024	686.5	686.097	678.721	678.607	664.737
33	1							37	693.369	693.155	691.644	689.233	683.324	641.135	639.19	637.444	634.005	632.695	517.75	506.77	505.188	497.916	493.802	654.63	649.387	639.11	634.376	629.602	658.746	656.646	653.069	643.314	636.665
37	1							42	676.731	673.221	671.723	662.509	659.603	613.47	608.139	604.875	599.873	598.099	489.136	486.025	483.133	479.635	478.635	622.789	621.424	616.612	613.366	608.56	625.841	622.783	601.537	597.825	595.49
37	1							45	654.601	654.593	652.273	650.202	649.25	586.804	581.352	581.217	561.987	556.612	473.69	467.474	466.842	436.541	423.171	604.177	598.088	593.47	588.873	588.47	593.692	582.382	580.614	573.397	562.801
40	1							50	639.486	637.479	609.105	597.57	593.273	549.422	544.807	539.987	533.488	516.805	423.058	402.728	397.308	387.24	378.831	587.141	582.829	574.986	571.844	525.72	541.688	524.638	506.139	504.129	502.484
40	1							53	580.911	517.456	512.313	510.683	500.174	513.62	503.951	498.609	496.749	471.438	369.968	369.827	363.718	346.21	340.786	521.284	520.804	505.158	490.512	483.505	499.196	490.73	484.872	460.621	440.694
40	1							58	498.731	498.521	483.183	452.228	447.792	457.216	444.944	430.078	427.282	414.476	326.579	325.875	323.003	321	317.472	479.043	451.285	443.05	430.827	412.619	436.363	428.013	419.178	404.843	392.66
42	1							61	446.643	440.746	428.874	414.034	396.832	402.256	399.421	379.902	338.976	333.48	303.291	280.923	276.011	250.668	248.005	405.835	405.487	388.18	347.804	334.029	388.866	355.019	354.717	337.297	331.03
42	1							66	392.354	376.926	367.716	337.384	260.358	329.308	301.112	275.215	274.854	237.841	218.883	216.501	199.943	164.556	147.315	319.616	313.588	304.897	242.703	230.337	325.963	319.5	297.65	265.631	235.521
42	1
44	1
44	1							Figure 5F
44	1
44	1
47	1
47	1
47	1
47	1
47	1
47	1
47	1
49	1
49	1
51	1
51	1
51	1
51	1
54	1
54	1
54	1
54	1
56	1
56	1
56	1
56	1
56	1
58	1
58	1
58	1
58	1
58	1
58	1
58	1
61	1
61	1
61	1
61	1
61	1
61	1
61	1
61	1
61	1
61	1
61	1
61	1
61	1
63	1
63	1
63	1
63	1
63	1
63	1
63	1
65	1
65	1
65	1
65	1
65	1
68	1
68	1
68	1
68	1
68	1
68	1
68	1
68	1
68	1
68	1
68	1
70	1
70	1
70	1
70	1
70	1
70	1
70	1
72	1
72	1
72	1
72	1
77	1
77	1
77	1
77	1
77	1
77	1
77	1
77	1
77	1
77	1
77	1
77	1
77	1
77	1
79	1
79	1
79	1
79	1
82	1
82	1
82	1
82	1
82	1
82	1
82	1
82	1
82	1
82	1
82	1
82	1
82	1
82	1
82	1
82	1
84	1
84	1
84	1
84	1
86	1
86	1
86	1
86	1
86	1
86	1
86	1
86	1
86	1
89	1
89	1
89	1
89	1
89	1
89	1
89	1
89	1
89	1
89	1
89	1
89	1
89	1
89	1
89	1
91	1
91	1
91	1
91	1
91	1
91	1
91	1
91	1
91	1
91	1
93	1
93	1
93	1
93	1
96	1
96	1
96	1
96	1
96	1
96	1
96	1
96	1
96	1
98	1
98	1
100	1
100	1
100	1
7		1
12		1
12		1
12		1
12		1
12		1
21		1
21		1
21		1
21		1
35		1
37		1
37		1
40		1
40		1
42		1
42		1
44		1
44		1
44		1
47		1
47		1
47		1
47		1
47		1
49		1
49		1
49		1
49		1
51		1
51		1
51		1
51		1
51		1
54		1
54		1
56		1
56		1
56		1
56		1
56		1
58		1
58		1
58		1
58		1
61		1
61		1
61		1
61		1
61		1
61		1
61		1
61		1
61		1
63		1
63		1
63		1
65		1
65		1
65		1
65		1
65		1
68		1
68		1
68		1
68		1
68		1
68		1
68		1
68		1
68		1
70		1
70		1
70		1
70		1
70		1
70		1
70		1
72		1
72		1
72		1
72		1
72		1
72		1
75		1
75		1
75		1
75		1
75		1
75		1
75		1
75		1
75		1
75		1
77		1
79		1
79		1
79		1
84		1
84		1
84		1
84		1
84		1
84		1
84		1
86		1
86		1
86		1
86		1
86		1
89		1
89		1
91		1
91		1
93		1
5			1
5			1
5			1
7			1
9			1
9			1
12			1
14			1
16			1
19			1
21			1
23			1
26			1
26			1
28			1
28			1
28			1
28			1
30			1
30			1
33			1
35			1
37			1
40			1
40			1
40			1
42			1
42			1
42			1
42			1
44			1
47			1
47			1
47			1
47			1
47			1
49			1
49			1
49			1
51			1
51			1
51			1
51			1
51			1
51			1
51			1
51			1
51			1
51			1
51			1
51			1
54			1
54			1
54			1
54			1
54			1
54			1
54			1
54			1
54			1
54			1
54			1
54			1
54			1
54			1
54			1
54			1
54			1
54			1
54			1
54			1
54			1
54			1
54			1
54			1
54			1
54			1
56			1
56			1
56			1
56			1
56			1
56			1
56			1
56			1
56			1
56			1
56			1
56			1
56			1
56			1
56			1
56			1
56			1
56			1
56			1
56			1
56			1
56			1
56			1
56			1
58			1
58			1
58			1
58			1
58			1
58			1
58			1
58			1
58			1
58			1
58			1
58			1
58			1
58			1
58			1
58			1
58			1
58			1
58			1
58			1
58			1
58			1
58			1
58			1
58			1
58			1
58			1
58			1
58			1
58			1
58			1
61			1
61			1
61			1
61			1
61			1
61			1
61			1
61			1
61			1
61			1
61			1
61			1
61			1
61			1
61			1
61			1
61			1
61			1
61			1
61			1
61			1
61			1
61			1
61			1
61			1
61			1
61			1
61			1
61			1
61			1
61			1
61			1
61			1
61			1
61			1
61			1
61			1
61			1
63			1
63			1
63			1
63			1
63			1
63			1
63			1
63			1
63			1
63			1
63			1
63			1
63			1
63			1
63			1
63			1
63			1
63			1
63			1
63			1
63			1
63			1
63			1
63			1
63			1
63			1
63			1
63			1
63			1
63			1
63			1
63			1
63			1
63			1
63			1
63			1
63			1
63			1
63			1
63			1
63			1
63			1
65			1
65			1
65			1
65			1
65			1
65			1
65			1
65			1
65			1
65			1
65			1
65			1
65			1
65			1
68			1
68			1
68			1
68			1
68			1
68			1
68			1
68			1
68			1
68			1
68			1
68			1
68			1
68			1
68			1
68			1
68			1
68			1
68			1
68			1
68			1
70			1
70			1
70			1
70			1
70			1
70			1
70			1
70			1
70			1
70			1
70			1
70			1
70			1
72			1
72			1
72			1
72			1
72			1
72			1
72			1
72			1
72			1
72			1
72			1
72			1
72			1
72			1
77			1
77			1
77			1
77			1
77			1
77			1
77			1
77			1
77			1
77			1
77			1
77			1
77			1
77			1
77			1
77			1
77			1
77			1
77			1
77			1
77			1
77			1
77			1
77			1
77			1
77			1
77			1
77			1
77			1
77			1
79			1
79			1
79			1
79			1
79			1
79			1
79			1
82			1
82			1
7				1
9				1
12				1
12				1
12				1
12				1
12				1
14				1
16				1
19				1
26				1
28				1
33				1
35				1
40				1
40				1
42				1
51				1
54				1
54				1
54				1
56				1
56				1
56				1
56				1
56				1
58				1
58				1
58				1
58				1
58				1
58				1
58				1
61				1
61				1
61				1
61				1
61				1
61				1
61				1
63				1
63				1
63				1
63				1
63				1
63				1
63				1
63				1
63				1
63				1
63				1
63				1
63				1
63				1
63				1
63				1
65				1
65				1
65				1
65				1
65				1
65				1
65				1
65				1
65				1
65				1
65				1
65				1
65				1
68				1
68				1
68				1
68				1
68				1
68				1
68				1
68				1
70				1
70				1
70				1
70				1
70				1
70				1
70				1
70				1
70				1
70				1
70				1
70				1
72				1
72				1
72				1
72				1
72				1
72				1
72				1
72				1
72				1
72				1
72				1
72				1
75				1
75				1
75				1
75				1
75				1
75				1
75				1
75				1
75				1
75				1
77				1
77				1
77				1
77				1
77				1
77				1
77				1
77				1
79				1
79				1
79				1
79				1
84				1
84				1
7					1
9					1
12					1
12					1
12					1
12					1
28					1
30					1
30					1
33					1
35					1
37					1
40					1
42					1
42					1
44					1
47					1
47					1
49					1
49					1
49					1
51					1
51					1
54					1
54					1
54					1
54					1
54					1
54					1
54					1
54					1
54					1
56					1
56					1
56					1
56					1
56					1
56					1
56					1
56					1
58					1
58					1
58					1
58					1
58					1
58					1
58					1
58					1
58					1
61					1
61					1
61					1
61					1
61					1
61					1
61					1
61					1
61					1
61					1
61					1
61					1
61					1
61					1
61					1
61					1
61					1
61					1
61					1
61					1
63					1
63					1
63					1
63					1
63					1
63					1
63					1
63					1
63					1
65					1
65					1
65					1
65					1
65					1
65					1
68					1
68					1
68					1
68					1
68					1
68					1
70					1
70					1
72					1

## Sheet: Figure 6
Figure 6A								Figure 6B
Age (days)	w1118;SCA2Q117;SCA2Q117 ♀︎	w1118;Sqh>dSesnWT♀︎	Sqh>SCA2Q117;SCA2Q117♀︎	Sqh>SCA2Q117;dSesnWT/SCA2Q117♀︎	Sqh>SCA2Q117;dSesnDA/SCA2Q117♀︎			Age (days)	w1118;SCA2Q117;SQA2Q117 ♀					w1118;Sqh>dSesnWT♀					Sqh>SCA2Q117;SCA2Q117 ♀					Sqh>SCA2Q117;dSesnWT/SCA2Q117♀					Sqh>SCA2Q117;dSesnDA/SCA2Q117♀
40	1							5	1044.66	976.349	964.157	949.179	899.338	1134.6	1039.77	1035.4	990.523	855.484	754.2	730.466	689.43	684.567	674.341	1035.52	979.678	935.976	933.723	908.861	933.414	923.34	847.756	845.124	812.028
44	1							10	898.487	898.095	884.629	880.287	876.646	830.119	820.309	816.378	812.752	801.872	640.741	628.013	626.28	616.628	609.632	866.638	855.484	832.195	820.309	793.317	797.079	776.383	749.265	743.027	727.167
47	1							13	860.568	852.31	851.013	842.887	832.82	793.317	792.77	788.257	782.796	782.54	599.097	583.673	583.548	583.501	577.987	788.401	788.257	787.787	782.796	776.882	725.73	707.457	700.453	679.513	678.091
47	1							18	819.439	797.195	793.909	789.471	784.885	773.518	759.828	752.697	751.092	750.192	573.453	570.818	568.326	560.711	546.204	773.518	756.815	746.315	742.767	730.934	673.617	669.146	664.434	653.115	651.887
47	1							21	773.63	772.318	771.172	771.159	766.253	742.767	740.231	737.382	731.501	723.182	544.317	543.773	540.354	536.886	518.923	714.464	679.268	678.071	674.601	669.42	648.505	644.039	637.46	634.064	633.254
47	1							26	765.805	765.442	760.308	749.519	738.225	712.481	708.488	702.499	698.271	689.315	518.599	516.917	511.245	498.123	496.368	662.645	661.962	661.911	659.37	658.647	617.922	594.34	587.133	580.03	578.931
49	1							29	708.42	706.995	691.204	690.449	681.024	674.601	673.255	669.42	668.364	663.876	494.029	493.645	486.08	482.984	481.653	640.477	636.5	629.418	628.615	626.549	577.3	571.51	567.159	554.739	541.997
49	1							34	661.098	648.509	636.964	617.507	613.39	662.775	654.387	642.791	640.472	639.511	474.466	471.16	465.768	465.187	455.245	625.549	618.511	601.552	601.194	597.048	537.584	536.726	517.066	513.697	511.742
51	1							37	611.596	606.471	581.69	574.684	573.733	635.297	635.093	611.764	604.429	593.19	450.423	449.446	440.7	437.383	430.863	594.367	588.402	586.752	584.85	583.451	511.298	506.187	505.491	497.749	482.471
54	1							42	553.035	550.701	548.295	547.291	525.96	592.918	586.752	576.096	575.583	549.702	422.155	410.321	408.895	406.784	402.013	583.098	583.065	566.958	558.946	557.042	481.743	476.416	467.802	461.829	458.773
54	1							45	520.456	520.37	515.924	512.428	505.142	475.264	455.823	452.611	451.066	446.035	399.542	395.191	391.932	389.576	388.696	552.325	541.456	540.026	528.127	522.58	457.908	452.941	451.238	443.801	437.806
56	1							50	503.626	495.977	479.072	475.451	470.583	445.487	444.794	428.431	417.261	409.22	378.227	356.01	324.612	308.273	296.097	504.994	500.969	487.58	485.813	465.722	424.332	420.826	380.92	380.14	373.881
58	1							53	466.006	463.111	461.466	444.025	438.092	400.941	357.613	340.481	337.477	336.57	295.069	290.027	289.675	289.369	278.161	464.217	455.93	450.998	449.972	437.444	369.526	359.429	356.088	330.132	325.895
58	1							58	431.74	425.014	421.079	420.984	419.109	336.09	327.229	324.865	323.577	318.264	276.67	270.865	261.779	261.054	256.748	392.639	387.154	372.464	358.197	338.669	309.749	290.329	289.741	287.913	285.914
61	1							61	417.825	392.459	390.919	370.636	361.114	311.427	300.325	286.091	266.775	264.955	251.138	246.738	236.058	218.438	212.252	331.805	296.227	283.833	266.768	263.094	279.645	277.214	258.235	242.659	220.957
61	1							66	348.579	319.962	276.659	267.246	239.727	262.04	240.267	233.508	232.067	226.3	195.048	146.315	139.026	120.648	57.196	256.855	237.554	231.774	212.611	204.839	170.555	170.549	136.185	133.713	132.018
61	1
61	1
61	1
63	1
63	1
63	1
63	1
63	1
63	1
63	1
63	1
63	1
63	1
63	1
63	1
65	1
65	1
65	1
65	1
68	1
68	1
68	1
68	1
68	1
68	1
68	1
68	1
68	1
70	1
70	1
70	1
70	1
72	1
72	1
72	1
72	1
72	1
72	1
77	1
77	1
77	1
77	1
77	1
77	1
77	1
77	1
77	1
77	1
77	1
77	1
77	1
77	1
77	1
77	1
77	1
77	1
77	1
77	1
77	1
79	1
79	1
79	1
79	1
79	1
79	1
79	1
79	1
79	1
79	1
79	1
79	1
79	1
79	1
79	1
79	1
79	1
79	1
79	1
79	1
79	1
79	1
79	1
79	1
79	1
79	1
79	1
82	1
82	1
82	1
82	1
82	1
82	1
82	1
82	1
82	1
82	1
82	1
82	1
82	1
82	1
82	1
82	1
82	1
82	1
82	1
82	1
82	1
82	1
82	1
82	1
82	1
84	1
84	1
84	1
84	1
84	1
84	1
84	1
84	1
84	1
84	1
84	1
84	1
84	1
84	1
84	1
84	1
84	1
84	1
84	1
84	1
84	1
84	1
84	1
86	1
86	1
86	1
86	1
86	1
86	1
86	1
86	1
86	1
86	1
86	1
86	1
86	1
86	1
89	1
89	1
89	1
89	1
89	1
89	1
89	1
91	1
91	1
91	1
91	1
91	1
91	1
91	1
91	1
91	1
91	1
91	1
93	1
93	1
93	1
93	1
93	1
93	1
93	1
93	1
96	1
96	1
96	1
96	1
96	1
96	1
96	1
98	1
98	1
98	1
98	1
98	1
100	1
9		1
12		1
12		1
12		1
12		1
12		1
28		1
40		1
42		1
47		1
54		1
54		1
61		1
63		1
65		1
65		1
68		1
68		1
68		1
68		1
68		1
68		1
70		1
70		1
70		1
70		1
70		1
70		1
70		1
70		1
70		1
70		1
70		1
70		1
70		1
70		1
70		1
70		1
70		1
70		1
70		1
70		1
70		1
70		1
70		1
70		1
70		1
70		1
72		1
72		1
72		1
72		1
72		1
75		1
75		1
77		1
77		1
77		1
77		1
77		1
77		1
77		1
77		1
77		1
77		1
77		1
77		1
77		1
77		1
77		1
79		1
79		1
79		1
79		1
79		1
79		1
79		1
79		1
79		1
79		1
84		1
84		1
84		1
84		1
84		1
84		1
84		1
84		1
84		1
84		1
84		1
84		1
84		1
84		1
84		1
84		1
84		1
84		1
84		1
84		1
84		1
84		1
84		1
84		1
84		1
84		1
84		1
84		1
84		1
84		1
84		1
86		1
86		1
86		1
86		1
86		1
86		1
86		1
86		1
86		1
86		1
86		1
89		1
89		1
89		1
89		1
89		1
89		1
91		1
91		1
93		1
93		1
5			1
7			1
7			1
7			1
9			1
14			1
19			1
23			1
33			1
37			1
40			1
40			1
42			1
42			1
42			1
42			1
44			1
44			1
44			1
44			1
44			1
44			1
44			1
44			1
44			1
47			1
47			1
47			1
47			1
47			1
47			1
47			1
47			1
47			1
47			1
47			1
49			1
49			1
49			1
49			1
49			1
49			1
49			1
49			1
51			1
51			1
51			1
51			1
51			1
51			1
51			1
51			1
51			1
51			1
51			1
51			1
51			1
51			1
54			1
54			1
54			1
54			1
54			1
54			1
54			1
54			1
54			1
54			1
54			1
54			1
54			1
54			1
54			1
54			1
54			1
54			1
56			1
56			1
56			1
56			1
56			1
56			1
56			1
56			1
56			1
56			1
56			1
56			1
56			1
56			1
56			1
56			1
56			1
56			1
56			1
56			1
56			1
56			1
56			1
56			1
56			1
56			1
56			1
56			1
56			1
56			1
56			1
56			1
56			1
56			1
56			1
56			1
56			1
56			1
56			1
56			1
56			1
56			1
56			1
56			1
56			1
56			1
56			1
56			1
56			1
58			1
58			1
58			1
58			1
58			1
58			1
58			1
58			1
58			1
58			1
58			1
58			1
58			1
58			1
58			1
58			1
58			1
58			1
58			1
58			1
58			1
58			1
58			1
58			1
58			1
58			1
58			1
58			1
58			1
58			1
58			1
58			1
58			1
58			1
58			1
58			1
58			1
58			1
58			1
58			1
58			1
58			1
58			1
58			1
58			1
58			1
61			1
61			1
61			1
61			1
61			1
61			1
61			1
61			1
61			1
61			1
61			1
61			1
61			1
61			1
61			1
61			1
61			1
61			1
61			1
61			1
61			1
61			1
61			1
61			1
61			1
61			1
61			1
61			1
61			1
61			1
61			1
61			1
61			1
61			1
61			1
61			1
61			1
61			1
61			1
61			1
61			1
61			1
61			1
61			1
61			1
61			1
61			1
61			1
61			1
61			1
61			1
61			1
61			1
61			1
61			1
63			1
63			1
63			1
63			1
63			1
63			1
63			1
63			1
63			1
63			1
63			1
63			1
63			1
63			1
63			1
63			1
63			1
63			1
63			1
63			1
63			1
63			1
63			1
63			1
63			1
65			1
65			1
65			1
65			1
65			1
65			1
65			1
65			1
65			1
65			1
65			1
65			1
65			1
65			1
65			1
65			1
65			1
65			1
65			1
65			1
68			1
68			1
68			1
68			1
68			1
68			1
68			1
68			1
68			1
68			1
68			1
68			1
68			1
70			1
70			1
70			1
70			1
70			1
70			1
70			1
70			1
70			1
72			1
72			1
72			1
7				1
7				1
9				1
9				1
12				1
12				1
16				1
16				1
19				1
26				1
40				1
44				1
44				1
44				1
47				1
47				1
47				1
47				1
47				1
47				1
47				1
47				1
47				1
49				1
49				1
49				1
49				1
49				1
49				1
49				1
49				1
51				1
51				1
51				1
51				1
51				1
51				1
54				1
54				1
54				1
54				1
54				1
54				1
54				1
54				1
54				1
54				1
54				1
56				1
56				1
56				1
58				1
58				1
58				1
58				1
58				1
58				1
58				1
58				1
58				1
58				1
58				1
61				1
61				1
61				1
61				1
61				1
61				1
61				1
61				1
61				1
61				1
61				1
63				1
63				1
63				1
63				1
63				1
63				1
63				1
63				1
63				1
63				1
63				1
63				1
63				1
63				1
63				1
63				1
63				1
63				1
63				1
65				1
65				1
65				1
65				1
65				1
65				1
65				1
65				1
65				1
65				1
65				1
65				1
65				1
65				1
68				1
68				1
68				1
68				1
68				1
68				1
68				1
68				1
68				1
68				1
68				1
68				1
68				1
68				1
68				1
68				1
68				1
68				1
68				1
68				1
68				1
68				1
68				1
68				1
68				1
68				1
68				1
68				1
68				1
68				1
68				1
68				1
68				1
68				1
70				1
70				1
70				1
70				1
70				1
70				1
70				1
70				1
70				1
72				1
72				1
72				1
72				1
72				1
72				1
72				1
75				1
75				1
75				1
77				1
5					1
5					1
7					1
7					1
9					1
14					1
14					1
16					1
19					1
23					1
26					1
26					1
28					1
30					1
30					1
33					1
35					1
35					1
35					1
35					1
35					1
37					1
37					1
37					1
37					1
40					1
40					1
40					1
40					1
40					1
40					1
40					1
40					1
42					1
42					1
42					1
42					1
42					1
42					1
42					1
44					1
44					1
44					1
44					1
47					1
47					1
47					1
47					1
47					1
47					1
47					1
47					1
47					1
47					1
47					1
47					1
49					1
49					1
49					1
49					1
49					1
51					1
51					1
51					1
51					1
51					1
51					1
51					1
51					1
54					1
54					1
54					1
54					1
54					1
54					1
54					1
54					1
54					1
54					1
54					1
56					1
56					1
56					1
56					1
56					1
56					1
56					1
56					1
56					1
56					1
56					1
56					1
58					1
58					1
58					1
58					1
61					1
61					1
61					1
61					1
61					1
61					1
61					1
61					1
61					1
61					1
61					1
61					1
63					1
63					1
63					1
63					1
63					1
65					1
65					1
68					1
68					1
68					1
68					1
68					1
68					1
70					1
70					1
70					1
75					1
Figure 6C								Figure 6D
Age (days)	w1118;SCA2Q117;SCA2Q117 ♂︎	w1118;Sqh>dSesnWT♂︎	Sqh>SCA2Q117;SCA2Q117♂︎	Sqh>SCA2Q117;dSesnWT/SCA2Q117♂︎	Sqh>SCA2Q117;dSesnDA/SCA2Q117♂︎			Age (days)	w1118;SCA2Q117;SQA2Q117 ♂					w1118;Sqh>dSesnWT♂					Sqh>SCA2Q117;SCA2Q117 ♂					Sqh>SCA2Q117;dSesnWT/SCA2Q117♂					Sqh>SCA2Q117;dSesnDA/SCA2Q117♂
5	1							5	1256.99	1232.01	1213.69	1188.77	1147.09	1080.47	997.843	968.211	935.182	928.038	842.358	781.146	761.735	743.05	734.255	1044.54	1020.49	1004.99	998.291	945.801	795.662	786.3	774.554	770.854	743.155
7	1							10	1126.54	1075.39	1053.26	1052.34	1041.48	921.792	914.647	898.055	897.081	891.987	722.607	711.788	705.553	693.506	690.488	903.443	875.736	874.658	864.616	864.576	733.347	707.741	701.981	696.975	677.8
7	1							13	1025.45	1020.36	994.515	973.023	972.429	887.119	877.212	868.893	842.688	840.54	680.762	674.148	670.93	668.282	657.136	859.945	859.839	859.115	859.086	857.778	659.796	647.82	640.432	639.582	636.501
12	1							18	968.401	943.24	941.807	934.02	932.74	835.515	835.402	819.901	817.594	814.486	641.457	634.948	626.59	623.764	623.747	853.094	852.054	849.479	843.993	825.081	628.698	621.534	620.128	618.65	618.318
19	1							21	928.541	923.287	913.218	897.688	892.325	804.123	803.023	773.148	757.194	752.328	611.557	609.057	606.083	605.9	600.365	816.218	791.458	787.575	757.901	752.394	606.388	605.334	593.972	592.218	590.318
19	1							26	879.286	875.79	874.511	874.11	864.397	731.871	729.296	728.921	728.263	716.869	599.921	590.623	582.832	574.213	567.577	745.731	742.189	736.314	728.186	723.338	588.166	587.246	579.452	578.109	572.757
21	1							29	854.238	836.529	822.768	818.141	796.608	716.857	714.801	709.986	706.485	700.229	567.226	559.393	554.676	548.522	540.857	715.125	710.246	708.875	708.769	707.092	565.164	565.004	563.083	554.049	528.494
28	1							34	790.638	748.006	746.901	736.426	729.292	689.371	682.799	676.175	671.546	654.009	538.323	537.689	521.707	521.383	520.635	705.83	701.854	679.113	678.795	667.024	519.632	519.477	519.059	514.371	504.291
33	1							37	693.369	693.155	691.644	689.233	683.324	641.135	639.19	637.444	634.005	632.695	517.75	506.77	505.188	497.916	493.802	654.63	649.387	639.11	634.376	629.602	504.005	502.292	500.562	499.051	498.181
37	1							42	676.731	673.221	671.723	662.509	659.603	613.47	608.139	604.875	599.873	598.099	489.136	486.025	483.133	479.635	478.635	622.789	621.424	616.612	613.366	608.56	493.686	485.755	478.016	472.412	472.099
37	1							45	654.601	654.593	652.273	650.202	649.25	586.804	581.352	581.217	561.987	556.612	473.69	467.474	466.842	436.541	423.171	604.177	598.088	593.47	588.873	588.47	468.542	466.25	462.294	452.704	450.58
40	1							50	639.486	637.479	609.105	597.57	593.273	549.422	544.807	539.987	533.488	516.805	423.058	402.728	397.308	387.24	378.831	587.141	582.829	574.986	571.844	525.72	447.423	445.738	439.795	419.267	363.457
40	1							53	580.911	517.456	512.313	510.683	500.174	513.62	503.951	498.609	496.749	471.438	369.968	369.827	363.718	346.21	340.786	521.284	520.804	505.158	490.512	483.505	344.949	336.34	305.033	302.93	297.713
40	1							58	498.731	498.521	483.183	452.228	447.792	457.216	444.944	430.078	427.282	414.476	326.579	325.875	323.003	321	317.472	479.043	451.285	443.05	430.827	412.619	296.382	290.809	286.045	278.636	270.443
42	1							61	446.643	440.746	428.874	414.034	396.832	402.256	399.421	379.902	338.976	333.48	303.291	280.923	276.011	250.668	248.005	405.835	405.487	388.18	347.804	334.029	261.953	246.072	244.455	236.617	194.125
42	1							66	392.354	376.926	367.716	337.384	260.358	329.308	301.112	275.215	274.854	237.841	218.883	216.501	199.943	164.556	147.315	319.616	313.588	304.897	242.703	230.337	188.442	184.933	165.781	150.332	118.632
42	1
44	1
44	1
44	1
44	1
47	1
47	1
47	1
47	1
47	1
47	1
47	1
49	1
49	1
51	1
51	1
51	1
51	1
54	1
54	1
54	1
54	1
56	1
56	1
56	1
56	1
56	1
58	1
58	1
58	1
58	1
58	1
58	1
58	1
61	1
61	1
61	1
61	1
61	1
61	1
61	1
61	1
61	1
61	1
61	1
61	1
61	1
63	1
63	1
63	1
63	1
63	1
63	1
63	1
65	1
65	1
65	1
65	1
65	1
68	1
68	1
68	1
68	1
68	1
68	1
68	1
68	1
68	1
68	1
68	1
70	1
70	1
70	1
70	1
70	1
70	1
70	1
72	1
72	1
72	1
72	1
77	1
77	1
77	1
77	1
77	1
77	1
77	1
77	1
77	1
77	1
77	1
77	1
77	1
77	1
79	1
79	1
79	1
79	1
82	1
82	1
82	1
82	1
82	1
82	1
82	1
82	1
82	1
82	1
82	1
82	1
82	1
82	1
82	1
82	1
84	1
84	1
84	1
84	1
86	1
86	1
86	1
86	1
86	1
86	1
86	1
86	1
86	1
89	1
89	1
89	1
89	1
89	1
89	1
89	1
89	1
89	1
89	1
89	1
89	1
89	1
89	1
89	1
91	1
91	1
91	1
91	1
91	1
91	1
91	1
91	1
91	1
91	1
93	1
93	1
93	1
93	1
96	1
96	1
96	1
96	1
96	1
96	1
96	1
96	1
96	1
98	1
98	1
100	1
100	1
100	1
7		1
12		1
12		1
12		1
12		1
12		1
21		1
21		1
21		1
21		1
35		1
37		1
37		1
40		1
40		1
42		1
42		1
44		1
44		1
44		1
47		1
47		1
47		1
47		1
47		1
49		1
49		1
49		1
49		1
51		1
51		1
51		1
51		1
51		1
54		1
54		1
56		1
56		1
56		1
56		1
56		1
58		1
58		1
58		1
58		1
61		1
61		1
61		1
61		1
61		1
61		1
61		1
61		1
61		1
63		1
63		1
63		1
65		1
65		1
65		1
65		1
65		1
68		1
68		1
68		1
68		1
68		1
68		1
68		1
68		1
68		1
70		1
70		1
70		1
70		1
70		1
70		1
70		1
72		1
72		1
72		1
72		1
72		1
72		1
75		1
75		1
75		1
75		1
75		1
75		1
75		1
75		1
75		1
75		1
77		1
79		1
79		1
79		1
84		1
84		1
84		1
84		1
84		1
84		1
84		1
86		1
86		1
86		1
86		1
86		1
89		1
89		1
91		1
91		1
93		1
5			1
5			1
5			1
7			1
9			1
9			1
12			1
14			1
16			1
19			1
21			1
23			1
26			1
26			1
28			1
28			1
28			1
28			1
30			1
30			1
33			1
35			1
37			1
40			1
40			1
40			1
42			1
42			1
42			1
42			1
44			1
47			1
47			1
47			1
47			1
47			1
49			1
49			1
49			1
51			1
51			1
51			1
51			1
51			1
51			1
51			1
51			1
51			1
51			1
51			1
51			1
54			1
54			1
54			1
54			1
54			1
54			1
54			1
54			1
54			1
54			1
54			1
54			1
54			1
54			1
54			1
54			1
54			1
54			1
54			1
54			1
54			1
54			1
54			1
54			1
54			1
54			1
56			1
56			1
56			1
56			1
56			1
56			1
56			1
56			1
56			1
56			1
56			1
56			1
56			1
56			1
56			1
56			1
56			1
56			1
56			1
56			1
56			1
56			1
56			1
56			1
58			1
58			1
58			1
58			1
58			1
58			1
58			1
58			1
58			1
58			1
58			1
58			1
58			1
58			1
58			1
58			1
58			1
58			1
58			1
58			1
58			1
58			1
58			1
58			1
58			1
58			1
58			1
58			1
58			1
58			1
58			1
61			1
61			1
61			1
61			1
61			1
61			1
61			1
61			1
61			1
61			1
61			1
61			1
61			1
61			1
61			1
61			1
61			1
61			1
61			1
61			1
61			1
61			1
61			1
61			1
61			1
61			1
61			1
61			1
61			1
61			1
61			1
61			1
61			1
61			1
61			1
61			1
61			1
61			1
63			1
63			1
63			1
63			1
63			1
63			1
63			1
63			1
63			1
63			1
63			1
63			1
63			1
63			1
63			1
63			1
63			1
63			1
63			1
63			1
63			1
63			1
63			1
63			1
63			1
63			1
63			1
63			1
63			1
63			1
63			1
63			1
63			1
63			1
63			1
63			1
63			1
63			1
63			1
63			1
63			1
63			1
65			1
65			1
65			1
65			1
65			1
65			1
65			1
65			1
65			1
65			1
65			1
65			1
65			1
65			1
68			1
68			1
68			1
68			1
68			1
68			1
68			1
68			1
68			1
68			1
68			1
68			1
68			1
68			1
68			1
68			1
68			1
68			1
68			1
68			1
68			1
70			1
70			1
70			1
70			1
70			1
70			1
70			1
70			1
70			1
70			1
70			1
70			1
70			1
72			1
72			1
72			1
72			1
72			1
72			1
72			1
72			1
72			1
72			1
72			1
72			1
72			1
72			1
77			1
77			1
77			1
77			1
77			1
77			1
77			1
77			1
77			1
77			1
77			1
77			1
77			1
77			1
77			1
77			1
77			1
77			1
77			1
77			1
77			1
77			1
77			1
77			1
77			1
77			1
77			1
77			1
77			1
77			1
79			1
79			1
79			1
79			1
79			1
79			1
79			1
82			1
82			1
7				1
9				1
12				1
12				1
12				1
12				1
12				1
14				1
16				1
19				1
26				1
28				1
33				1
35				1
40				1
40				1
42				1
51				1
54				1
54				1
54				1
56				1
56				1
56				1
56				1
56				1
58				1
58				1
58				1
58				1
58				1
58				1
58				1
61				1
61				1
61				1
61				1
61				1
61				1
61				1
63				1
63				1
63				1
63				1
63				1
63				1
63				1
63				1
63				1
63				1
63				1
63				1
63				1
63				1
63				1
63				1
65				1
65				1
65				1
65				1
65				1
65				1
65				1
65				1
65				1
65				1
65				1
65				1
65				1
68				1
68				1
68				1
68				1
68				1
68				1
68				1
68				1
70				1
70				1
70				1
70				1
70				1
70				1
70				1
70				1
70				1
70				1
70				1
70				1
72				1
72				1
72				1
72				1
72				1
72				1
72				1
72				1
72				1
72				1
72				1
72				1
75				1
75				1
75				1
75				1
75				1
75				1
75				1
75				1
75				1
75				1
77				1
77				1
77				1
77				1
77				1
77				1
77				1
77				1
79				1
79				1
79				1
79				1
84				1
84				1
5					1
7					1
19					1
21					1
21					1
21					1
21					1
26					1
28					1
35					1
35					1
35					1
40					1
40					1
40					1
40					1
40					1
40					1
42					1
42					1
42					1
42					1
47					1
47					1
47					1
47					1
47					1
47					1
47					1
47					1
49					1
51					1
51					1
51					1
51					1
51					1
51					1
54					1
54					1
54					1
54					1
54					1
54					1
54					1
54					1
56					1
56					1
56					1
56					1
58					1
58					1
58					1
58					1
58					1
58					1
58					1
58					1
58					1
58					1
58					1
58					1
61					1
61					1
61					1
61					1
61					1
61					1
61					1
61					1
61					1
63					1
63					1
63					1
65					1
65					1
65					1
68					1
68					1
68					1
68					1
68					1
70					1
70					1
72					1
Figure 6E								Figure 6F
Age (days)	w1118;SCA2Q117;SCA2Q117 ♀︎	w1118;Sqh>dSesnWT♀︎	Sqh>SCA2Q117;SCA2Q117♀︎	Sqh>SCA2Q117;dSesnWT/SCA2Q117♀︎	Sqh>SCA2Q117;dSesnDDAASCA2Q117♀︎			Age (days)	w1118;SCA2Q117;SQA2Q117 ♀					w1118;Sqh>dSesnWT♀					Sqh>SCA2Q117;SCA2Q117 ♀					Sqh>SCA2Q117;dSesnWT/SCA2Q117♀					Sqh>SCA2Q117;dSesnDDAA/SCA2Q117♀
40	1							5	1044.66	976.349	964.157	949.179	899.338	1134.6	1039.77	1035.4	990.523	855.484	754.2	730.466	689.43	684.567	674.341	1035.52	979.678	935.976	933.723	908.861	915.617	858.907	774.048	765.587	755.229
44	1							10	898.487	898.095	884.629	880.287	876.646	830.119	820.309	816.378	812.752	801.872	640.741	628.013	626.28	616.628	609.632	866.638	855.484	832.195	820.309	793.317	754.974	751.877	749.071	735.148	715.73
47	1							13	860.568	852.31	851.013	842.887	832.82	793.317	792.77	788.257	782.796	782.54	599.097	583.673	583.548	583.501	577.987	788.401	788.257	787.787	782.796	776.882	706.438	706.128	698.154	694.232	688.566
47	1							18	819.439	797.195	793.909	789.471	784.885	773.518	759.828	752.697	751.092	750.192	573.453	570.818	568.326	560.711	546.204	773.518	756.815	746.315	742.767	730.934	687.572	684.322	673.634	671.124	668.666
47	1							21	773.63	772.318	771.172	771.159	766.253	742.767	740.231	737.382	731.501	723.182	544.317	543.773	540.354	536.886	518.923	714.464	679.268	678.071	674.601	669.42	665.088	653.551	647.096	636.164	635.869
47	1							26	765.805	765.442	760.308	749.519	738.225	712.481	708.488	702.499	698.271	689.315	518.599	516.917	511.245	498.123	496.368	662.645	661.962	661.911	659.37	658.647	626.334	625.85	612.919	608.555	602.455
49	1							29	708.42	706.995	691.204	690.449	681.024	674.601	673.255	669.42	668.364	663.876	494.029	493.645	486.08	482.984	481.653	640.477	636.5	629.418	628.615	626.549	593.848	587.572	579.804	574.312	569.352
49	1							34	661.098	648.509	636.964	617.507	613.39	662.775	654.387	642.791	640.472	639.511	474.466	471.16	465.768	465.187	455.245	625.549	618.511	601.552	601.194	597.048	568.275	556.685	551.111	551.035	547.234
51	1							37	611.596	606.471	581.69	574.684	573.733	635.297	635.093	611.764	604.429	593.19	450.423	449.446	440.7	437.383	430.863	594.367	588.402	586.752	584.85	583.451	544.553	531.979	519.631	507.552	505.618
54	1							42	553.035	550.701	548.295	547.291	525.96	592.918	586.752	576.096	575.583	549.702	422.155	410.321	408.895	406.784	402.013	583.098	583.065	566.958	558.946	557.042	499.036	481.082	480.694	467.279	462.596
54	1							45	520.456	520.37	515.924	512.428	505.142	475.264	455.823	452.611	451.066	446.035	399.542	395.191	391.932	389.576	388.696	552.325	541.456	540.026	528.127	522.58	460.296	453.656	452.111	449.704	446.813
56	1							50	503.626	495.977	479.072	475.451	470.583	445.487	444.794	428.431	417.261	409.22	378.227	356.01	324.612	308.273	296.097	504.994	500.969	487.58	485.813	465.722	439.406	429.31	417.607	416.885	394.624
58	1							53	466.006	463.111	461.466	444.025	438.092	400.941	357.613	340.481	337.477	336.57	295.069	290.027	289.675	289.369	278.161	464.217	455.93	450.998	449.972	437.444	390.283	342.419	335.243	325.919	325.623
58	1							58	431.74	425.014	421.079	420.984	419.109	336.09	327.229	324.865	323.577	318.264	276.67	270.865	261.779	261.054	256.748	392.639	387.154	372.464	358.197	338.669	316.064	304.451	302.075	269.855	265.545
61	1							61	417.825	392.459	390.919	370.636	361.114	311.427	300.325	286.091	266.775	264.955	251.138	246.738	236.058	218.438	212.252	331.805	296.227	283.833	266.768	263.094	253.068	231.762	227.047	206.932	188.936
61	1							66	348.579	319.962	276.659	267.246	239.727	262.04	240.267	233.508	232.067	226.3	195.048	146.315	139.026	120.648	57.196	256.855	237.554	231.774	212.611	204.839	188.278	183.893	178.068	160.529	131.04
61	1
61	1
61	1
63	1
63	1
63	1
63	1
63	1
63	1
63	1
63	1
63	1
63	1
63	1
63	1
65	1
65	1
65	1
65	1
68	1
68	1
68	1
68	1
68	1
68	1
68	1
68	1
68	1
70	1
70	1
70	1
70	1
72	1
72	1
72	1
72	1
72	1
72	1
77	1
77	1
77	1
77	1
77	1
77	1
77	1
77	1
77	1
77	1
77	1
77	1
77	1
77	1
77	1
77	1
77	1
77	1
77	1
77	1
77	1
79	1
79	1
79	1
79	1
79	1
79	1
79	1
79	1
79	1
79	1
79	1
79	1
79	1
79	1
79	1
79	1
79	1
79	1
79	1
79	1
79	1
79	1
79	1
79	1
79	1
79	1
79	1
82	1
82	1
82	1
82	1
82	1
82	1
82	1
82	1
82	1
82	1
82	1
82	1
82	1
82	1
82	1
82	1
82	1
82	1
82	1
82	1
82	1
82	1
82	1
82	1
82	1
84	1
84	1
84	1
84	1
84	1
84	1
84	1
84	1
84	1
84	1
84	1
84	1
84	1
84	1
84	1
84	1
84	1
84	1
84	1
84	1
84	1
84	1
84	1
86	1
86	1
86	1
86	1
86	1
86	1
86	1
86	1
86	1
86	1
86	1
86	1
86	1
86	1
89	1
89	1
89	1
89	1
89	1
89	1
89	1
91	1
91	1
91	1
91	1
91	1
91	1
91	1
91	1
91	1
91	1
91	1
93	1
93	1
93	1
93	1
93	1
93	1
93	1
93	1
96	1
96	1
96	1
96	1
96	1
96	1
96	1
98	1
98	1
98	1
98	1
98	1
100	1
9		1
12		1
12		1
12		1
12		1
12		1
28		1
40		1
42		1
47		1
54		1
54		1
61		1
63		1
65		1
65		1
68		1
68		1
68		1
68		1
68		1
68		1
70		1
70		1
70		1
70		1
70		1
70		1
70		1
70		1
70		1
70		1
70		1
70		1
70		1
70		1
70		1
70		1
70		1
70		1
70		1
70		1
70		1
70		1
70		1
70		1
70		1
70		1
72		1
72		1
72		1
[truncated: 1,495 more rows]

## Sheet: Figure 7
Figure 7A								Figure 7B							Figure 7C/F
sqh> ATXN2Q117; ATXN2Q117 ♀︎	sqh> ATXN2Q117; dSesnWT; ATXN2Q117 ♀︎	sqh> SCA2Q117; dSesnCS; SCA2Q117 ♀︎	sqh> ATXN2Q117; dSesnDA; ATXN2Q117 ♀︎	sqh> ATXN2Q117; dSesnDDAA; ATXN2Q117 ♀︎				sqh> ATXN2Q117; ATXN2Q117 ♂︎	sqh> ATXN2Q117; dSesnWT; ATXN2Q117 ♂︎	sqh> ATXN2Q117; dSesnCS; ATXN2Q117 ♂︎	sqh> SCA2Q117; dSesnDA; SCA2Q117 ♂︎	sqh> ATXN2Q117; dSesnDDAA; ATXN2Q117 ♂︎
1	0.684008	0.412097	0.122267	0.402412				1	0.547507	0.460953	0.168312	0.5337
1	0.648941	0.584133	0.764202	0.830581				1	0.663768	0.332404	0.694934	0.460055
1	0.604136	0.28167	0.6111	0.688247				1	0.474226	0.124764	0.402478	0.510286
1	0.52325	0.683566	0.612041	0.841063				1	0.401288	0.799774	0.923747	0.806056
1	0.660779	0.568308	0.568326	0.80892				1	0.67067	0.884151	0.76661	0.862746
Figure 7D								Figure 7E
sqh> ATXN2Q117; ATXN2Q117 ♀︎	sqh> ATXN2Q117; dSesnWT; ATXN2Q117 ♀︎	sqh> ATXN2Q117; dSesnCS; ATXN2Q117 ♀︎	sqh> ATXN2Q117; dSesnDA; ATXN2Q117 ♀︎	sqh> ATXN2Q117; dSesnDDAA; ATXN2Q117 ♀︎				sqh> ATXN2Q117; ATXN2Q117 ♂︎	sqh> ATXN2Q117; dSesnWT; ATXN2Q117 ♂︎	sqh> ATXN2Q117; dSesnCS; ATXN2Q117 ♂︎	sqh> ATXN2Q117; dSesnDA; ATXN2Q117 ♂︎	sqh> ATXN2Q117; dSesnDDAA; ATXN2Q117 ♂︎
0.751259	1.04291	0.526077	0.932754	0.689665				0.451975	0.806556	0.702559	0.720199	0.590182
0.567431	0.821816	0.581946	0.472243	0.401203				0.437344	0.668319	0.45535	0.410138	0.546764
0.564919	0.754434	0.868399	0.487606	0.608999				0.59162	0.824497	0.77258	0.779654	0.850336
0.701643	1.2016	1.1363	1.02526	1.05578				0.675387	1.0542	0.954603	0.918557	1.0746
0.680729	1.11888	0.797599	0.830456	0.779594				0.679156	0.906398	0.794367	0.779836	0.860858

## Sheet: Figure 8
Figure 8A					Figure 8B					Figure 8C					Figure 8D
Age (Days)	Sqh>ATXN2Q117;ATXN2Q117 UN ♀︎	Sqh>ATXN2Q117;ATXN2Q117 EX ♀︎			Age (Days)	Sqh>ATXN2Q117;ATXN2Q117 UN ♀︎	Sqh>ATXN2Q117;ATXN2Q117 EX ♀︎			Age (Days)	elav(GS)>ATXN2Q117;ATXN2Q117 UN	elav(GS)>ATXN2Q117;ATXN2Q117 EX			Age (Days)	elav(GS)>ATXN2Q117;ATXN2Q117 UN	elav(GS)>ATXN2Q117;ATXN2Q117 EX
4	1				4	1				3	1				3	1
6	1				5	1				3	1				3	1
14	1				10	1				3	1				3	1
18	1				10	1				4	1				3	1
26	1				11	1				5	1				4	1
33	1				11	1				10	1				4	1
33	1				11	1				19	1				4	1
45	1				11	1				21	1				5	1
45	1				18	1				21	1				5	1
45	1				20	1				21	1				5	1
45	1				24	1				21	1				6	1
45	1				24	1				26	1				7	1
47	1				24	1				26	1				10	1
47	1				38	1				26	1				13	1
47	1				47	1				26	1				17	1
47	1				47	1				28	1				19	1
47	1				49	1				31	1				19	1
47	1				52	1				31	1				21	1
47	1				52	1				31	1				21	1
47	1				52	1				33	1				21	1
47	1				52	1				35	1				24	1
47	1				54	1				38	1				24	1
47	1				54	1				40	1				26	1
47	1				56	1				40	1				26	1
47	1				56	1				42	1				26	1
49	1				56	1				42	1				28	1
49	1				56	1				45	1				28	1
49	1				59	1				45	1				31	1
49	1				59	1				45	1				31	1
49	1				59	1				45	1				31	1
49	1				59	1				45	1				31	1
49	1				59	1				45	1				31	1
49	1				59	1				47	1				31	1
49	1				59	1				47	1				33	1
49	1				59	1				47	1				33	1
49	1				59	1				47	1				35	1
49	1				59	1				49	1				35	1
49	1				59	1				49	1				38	1
49	1				59	1				49	1				38	1
52	1				59	1				49	1				38	1
52	1				59	1				49	1				40	1
52	1				59	1				49	1				40	1
52	1				59	1				49	1				40	1
52	1				59	1				52	1				40	1
52	1				59	1				52	1				40	1
52	1				59	1				52	1				40	1
52	1				59	1				52	1				40	1
52	1				59	1				52	1				42	1
52	1				59	1				52	1				42	1
54	1				61	1				52	1				42	1
54	1				61	1				52	1				42	1
54	1				61	1				52	1				42	1
54	1				61	1				52	1				42	1
54	1				61	1				52	1				42	1
56	1				61	1				52	1				42	1
56	1				61	1				52	1				42	1
56	1				61	1				52	1				45	1
56	1				61	1				52	1				45	1
56	1				61	1				54	1				45	1
59	1				61	1				54	1				45	1
59	1				61	1				54	1				45	1
59	1				61	1				54	1				45	1
59	1				61	1				54	1				45	1
59	1				61	1				54	1				45	1
59	1				61	1				54	1				45	1
59	1				61	1				54	1				45	1
59	1				61	1				54	1				45	1
59	1				61	1				54	1				45	1
59	1				61	1				54	1				45	1
59	1				61	1				54	1				45	1
59	1				63	1				54	1				47	1
59	1				63	1				56	1				47	1
59	1				63	1				56	1				47	1
59	1				63	1				56	1				47	1
59	1				63	1				56	1				47	1
59	1				63	1				56	1				47	1
59	1				63	1				56	1				47	1
59	1				63	1				56	1				47	1
59	1				63	1				56	1				47	1
59	1				63	1				56	1				47	1
59	1				63	1				56	1				47	1
59	1				63	1				56	1				47	1
59	1				63	1				56	1				47	1
59	1				63	1				56	1				47	1
59	1				63	1				56	1				47	1
59	1				63	1				56	1				49	1
59	1				63	1				59	1				49	1
59	1				63	1				59	1				49	1
59	1				63	1				59	1				49	1
59	1				63	1				59	1				49	1
59	1				63	1				59	1				49	1
59	1				63	1				59	1				49	1
59	1				63	1				59	1				49	1
59	1				66	1				59	1				49	1
59	1				66	1				59	1				49	1
61	1				66	1				59	1				49	1
61	1				66	1				59	1				52	1
61	1				66	1				59	1				52	1
61	1				66	1				59	1				52	1
61	1				66	1				59	1				52	1
61	1				66	1				59	1				52	1
61	1				66	1				59	1				52	1
61	1				66	1				59	1				52	1
61	1				66	1				59	1				52	1
61	1				66	1				61	1				52	1
61	1				66	1				61	1				52	1
61	1				66	1				61	1				52	1
61	1				66	1				61	1				52	1
61	1				66	1				61	1				52	1
61	1				66	1				61	1				52	1
61	1				66	1				61	1				52	1
61	1				66	1				61	1				52	1
61	1				66	1				61	1				52	1
61	1				66	1				61	1				52	1
61	1				66	1				61	1				52	1
61	1				66	1				63	1				52	1
61	1				66	1				63	1				52	1
61	1				66	1				63	1				54	1
63	1				68	1				63	1				54	1
63	1				68	1				63	1				54	1
63	1				68	1				63	1				54	1
63	1				68	1				66	1				54	1
63	1				68	1				66	1				54	1
63	1				68	1				66	1				54	1
63	1				68	1				66	1				54	1
63	1				68	1				66	1				54	1
63	1				68	1				66	1				54	1
63	1				68	1				66	1				54	1
63	1				68	1				66	1				54	1
63	1				68	1				66	1				54	1
63	1				68	1				66	1				54	1
63	1				68	1				66	1				56	1
63	1				68	1				66	1				56	1
63	1				68	1				66	1				56	1
63	1				68	1				66	1				56	1
63	1				68	1				68	1				56	1
63	1				68	1				68	1				56	1
63	1				68	1				68	1				56	1
63	1				68	1				68	1				56	1
63	1				68	1				68	1				56	1
63	1				68	1				68	1				56	1
66	1				68	1				68	1				56	1
66	1				68	1				68	1				56	1
66	1				68	1				68	1				56	1
66	1				68	1				68	1				56	1
66	1				68	1				68	1				56	1
66	1				68	1				68	1				56	1
66	1				68	1				68	1				56	1
66	1				70	1				70	1				56	1
66	1				70	1				70	1				56	1
66	1				70	1				70	1				56	1
66	1				70	1				70	1				56	1
68	1				70	1				70	1				59	1
68	1				70	1				70	1				59	1
68	1				70	1				70	1				59	1
68	1				70	1				73	1				59	1
68	1				70	1				73	1				59	1
68	1				70	1				73	1				59	1
68	1				70	1				73	1				59	1
68	1				70	1				73	1				59	1
68	1				70	1				73	1				59	1
68	1				70	1				73	1				59	1
70	1				70	1				73	1				59	1
70	1				70	1				73	1				59	1
70	1				70	1				73	1				61	1
70	1				70	1				73	1				61	1
70	1				70	1				73	1				61	1
70	1				73	1				73	1				61	1
70	1				73	1				73	1				61	1
70	1				73	1				73	1				61	1
70	1				73	1				75	1				61	1
73	1				73	1				75	1				61	1
73	1				73	1				75	1				61	1
73	1				73	1				75	1				61	1
73	1				73	1				75	1				61	1
73	1				73	1				75	1				63	1
73	1				73	1				75	1				63	1
73	1				73	1				75	1				63	1
73	1				73	1				75	1				63	1
75	1				73	1				75	1				63	1
75	1				73	1				77	1				63	1
75	1				73	1				77	1				66	1
75	1				73	1				77	1				66	1
75	1				73	1				77	1				66	1
75	1				73	1				77	1				66	1
77	1				73	1				77	1				68	1
77	1				73	1				77	1				70	1
80	1				75	1				77	1				70	1
80	1				77	1				77	1				73	1
80	1				77	1				77	1				73	1
80	1				77	1				77	1				3		1
82	1				77	1				77	1				3		1
5		1			77	1				80	1				4		1
6		1			77	1				80	1				4		1
7		1			77	1				80	1				5		1
11		1			77	1				80	1				5		1
21		1			77	1				80	1				5		1
35		1			80	1				80	1				5		1
35		1			4		1			80	1				17		1
38		1			28		1			84	1				21		1
47		1			31		1			3		1			24		1
49		1			31		1			3		1			24		1
49		1			31		1			3		1			28		1
49		1			31		1			5		1			31		1
49		1			31		1			5		1			33		1
54		1			38		1			5		1			33		1
54		1			38		1			6		1			33		1
54		1			40		1			6		1			33		1
56		1			45		1			7		1			33		1
59		1			49		1			11		1			35		1
59		1			52		1			14		1			38		1
59		1			52		1			17		1			38		1
59		1			54		1			21		1			38		1
59		1			54		1			33		1			38		1
59		1			54		1			33		1			40		1
59		1			54		1			33		1			40		1
59		1			56		1			35		1			40		1
59		1			56		1			38		1			40		1
59		1			56		1			38		1			40		1
59		1			56		1			40		1			40		1
59		1			56		1			40		1			40		1
59		1			56		1			40		1			40		1
59		1			56		1			40		1			40		1
59		1			59		1			40		1			40		1
59		1			59		1			40		1			40		1
59		1			59		1			42		1			42		1
59		1			59		1			42		1			42		1
59		1			59		1			42		1			42		1
59		1			59		1			45		1			42		1
59		1			59		1			45		1			42		1
59		1			59		1			45		1			42		1
59		1			59		1			45		1			42		1
59		1			59		1			45		1			42		1
59		1			59		1			47		1			42		1
59		1			59		1			47		1			45		1
59		1			59		1			47		1			45		1
59		1			59		1			47		1			45		1
59		1			59		1			47		1			45		1
59		1			59		1			47		1			45		1
59		1			59		1			49		1			45		1
59		1			59		1			49		1			45		1
59		1			59		1			49		1			45		1
59		1			59		1			49		1			45		1
59		1			59		1			49		1			45		1
61		1			59		1			49		1			45		1
61		1			59		1			52		1			45		1
61		1			59		1			52		1			45		1
61		1			59		1			52		1			45		1
61		1			59		1			52		1			45		1
61		1			59		1			52		1			47		1
61		1			59		1			52		1			47		1
61		1			59		1			52		1			47		1
61		1			59		1			52		1			47		1
61		1			59		1			52		1			47		1
61		1			59		1			52		1			47		1
61		1			59		1			52		1			47		1
61		1			59		1			52		1			47		1
61		1			59		1			52		1			47		1
61		1			59		1			52		1			47		1
61		1			59		1			54		1			47		1
61		1			59		1			54		1			47		1
61		1			59		1			54		1			47		1
61		1			59		1			56		1			47		1
61		1			59		1			56		1			47		1
61		1			59		1			56		1			49		1
61		1			59		1			56		1			49		1
63		1			59		1			56		1			49		1
63		1			59		1			56		1			49		1
63		1			59		1			56		1			49		1
63		1			59		1			56		1			49		1
63		1			59		1			56		1			49		1
63		1			61		1			56		1			49		1
63		1			61		1			59		1			49		1
63		1			61		1			59		1			49		1
63		1			61		1			59		1			52		1
63		1			61		1			59		1			52		1
63		1			61		1			59		1			52		1
63		1			61		1			59		1			52		1
63		1			61		1			59		1			52		1
63		1			61		1			59		1			52		1
63		1			61		1			61		1			52		1
63		1			61		1			61		1			52		1
63		1			61		1			61		1			52		1
63		1			61		1			61		1			52		1
63		1			61		1			61		1			52		1
63		1			61		1			61		1			52		1
66		1			61		1			61		1			52		1
66		1			61		1			61		1			52		1
66		1			63		1			61		1			52		1
66		1			63		1			61		1			52		1
66		1			63		1			63		1			52		1
66		1			63		1			63		1			52		1
66		1			63		1			63		1			52		1
66		1			63		1			63		1			52		1
66		1			63		1			63		1			52		1
66		1			63		1			63		1			54		1
66		1			63		1			63		1			54		1
66		1			63		1			63		1			54		1
66		1			63		1			63		1			54		1
66		1			63		1			66		1			54		1
66		1			63		1			66		1			54		1
66		1			63		1			66		1			54		1
66		1			63		1			66		1			54		1
66		1			66		1			66		1			54		1
66		1			66		1			66		1			54		1
68		1			66		1			66		1			54		1
68		1			66		1			66		1			54		1
68		1			66		1			66		1			54		1
68		1			66		1			66		1			54		1
68		1			66		1			66		1			54		1
68		1			68		1			66		1			54		1
68		1			68		1			66		1			54		1
68		1			68		1			66		1			56		1
68		1			68		1			68		1			56		1
68		1			68		1			68		1			56		1
68		1			68		1			68		1			56		1
70		1			68		1			68		1			56		1
70		1			68		1			68		1			56		1
70		1			68		1			68		1			56		1
70		1			70		1			68		1			56		1
70		1			70		1			68		1			56		1
70		1			70		1			68		1			56		1
70		1			70		1			68		1			56		1
70		1			70		1			68		1			56		1
70		1			70		1			68		1			56		1
70		1			70		1			68		1			56		1
70		1			70		1			68		1			59		1
70		1			70		1			68		1			59		1
70		1			73		1			70		1			59		1
73		1			73		1			70		1			59		1
73		1			73		1			70		1			59		1
73		1			73		1			70		1			59		1
73		1			73		1			70		1			59		1
73		1			73		1			70		1			59		1
73		1			73		1			70		1			59		1
73		1			73		1			70		1			61		1
73		1			73		1			70		1			61		1
73		1			73		1			70		1			61		1
73		1			73		1			70		1			61		1
73		1			73		1			70		1			61		1
73		1			73		1			70		1			61		1
73		1			73		1			70		1			61		1
73		1			73		1			70		1			61		1
73		1			73		1			70		1			63		1
73		1			75		1			70		1			63		1
73		1			75		1			73		1			63		1
73		1			75		1			73		1			63		1
73		1			75		1			73		1			63		1
73		1			75		1			73		1			63		1
73		1			75		1			73		1			63		1
73		1			75		1			73		1			66		1
75		1			77		1			73		1			66		1
75		1			77		1			73		1			66		1
75		1			77		1			73		1			66		1
75		1			77		1			73		1			66		1
75		1			77		1			73		1			66		1
75		1			77		1			73		1			66		1
75		1			77		1			73		1			66		1
75		1			77		1			73		1			68		1
77		1			77		1			73		1			68		1
77		1			80		1			73		1			68		1
77		1			80		1			73		1			70		1
77		1			80		1			73		1			70		1
77		1			80		1			73		1			70		1
77		1			80		1			73		1			73		1
77		1			80		1			73		1			73		1
77		1			80		1			73		1
77		1			80		1			73		1
77		1								73		1
77		1								75		1
77		1								75		1
77		1								75		1
77		1								75		1
77		1								75		1
80		1								75		1
80		1								75		1
80		1								75		1
80		1								75		1
80		1								77		1
80		1								77		1
80		1								77		1
82		1								80		1
84		1								80		1
										80		1
										80		1
										80		1
										80		1
										80		1
										80		1
										80		1
										80		1
										80		1
										80		1
										80		1
										80		1
										80		1
										80		1
										80		1
										80		1
										84		1
										84		1
										84		1
										84		1

## Sheet: Figure S1
Figure S1A
Age (weeks)	RU- UN																				RU- EX																				RU+ UN
0	2.61	2.84314	2.85148	3.51515	2.9898	2.46316	2.65625	2.9	2.48913	2.38947	2.38462	2.37079	2.80645	2.69231	2.55102	2.31868	2.32632	2.53061	2.29897	2.39583	2.52577	2.7732	2.69792	2.6	2.44898	2.76	2.77419	2.5	2.66667	2.5914	2.18557	2.27551	2.48515	2.34783	2.23958	2.20619	2.52083	2.42708	2.54023	2.69474	2.38043	2.5	2.26667	2.45263	2.43011	2.6421	2.57576	2.93617	2.21978
1	2.47	2.57292	2.58763	2.74	2.19388	2.30107	2.35353	2.09184	2.29592	2.25	2.32632	2.32222	2.33708	2.5	2.23596	2.21978	1.01205	0.987342	1.17284	1.2093	2.45745	2.49462	2.71429	2.66	2.71717	2.69072	2.27368	2.45161	2.35106	2.43158	2.75	2.61798	2.49451	2.50602	2.43182	2.25843	1.62766	1.78495	1.43678	1.60215	2.75	2.56566	2.86	2.86316	2.47368	1.98925	2.54255	2.51579	2.4086
2	1.21687	1.48235	1.54651	1.51163	1	0.975904	1.02128	1.41026	1.06897	1.24211	1.08434	1	1.24138	1.27381	1.13483	1.5	0.864198	1.07778	0.905882	0.977778	1.87778	2.12766	2.14894	2.40659	1.23913	1.1236	1.52083	1.36735	1.5055	1.41667	1.27778	1.3956	1.4	1.65346	1.36047	1.47312	1.45263	1.40698	1.48913	1.63529	1.67442	1.18182	1.52688	1.71739	1.22472	1.2	0.883117	0.934211	1.25556
3	0.626667	1.05747	1.18557	1.02198	0.987342	0.911392	0.857143	1.12903	1.17073	1.20988	0.928571	1.07865	0.888889	0.746835	1.02222	0.926829	1.16867	1	1.04412	0.825	1.2907	1.44086	1.47253	1.44828	1.30682	1.32609	1.28736	1.45055	1.45556	1.49412	1.54444	1.53763	1.08989	1.09375	1.09639	1.05051	1.07059	1.25301	1.13846	1.6	0.884615	1.17647	1.21348	1.25301	1.46809	1	0.953488	0.939024	1
4	0.369652	0.390775	0.390188	0.401795	0.676192	0.504525	0.591443	0.518473	0.469675	0.561871	0.542156	0.508871	0.462065	0.483391	0.539886	0.531049	0.363876	0.369652	0.278505	0.262506	1.23611	1.25	1.55224	1.58667	1.08	1.20833	1.1831	1.32895	1.19403	0.931507	1.14286	1.38158	1.33333	1.23636	0.850746	1.25714	0.844828	0.686275	0.625	0.646154	1.11842	0.457662	0.48593	0.573883	0.484583	0.75995	0.632902	0.710423	0.610752
5	0.218	0.3581	0.289727	0.307175	0.218155	0.352324	0.335151	0.312782	0.350196	0.298106	0.315291	0.175736	0.153548	0.22555	0.267679	0.246435					0.787234	0.6	0.666667	0.609375	0.79661	0.964286	0.5	0.5	0.584906	0.425532	0.638298	0.732143	0.85	0.764706	1.09091	0.463768					0.8	0.327363	0.461443	0.380983	0.425572	0.402025	0.376203	0.328824	0.278607
Figure S1B
Time to Fatigue (Minutes)	ELAV GS>pwEmpty RU- UN	ELAV GS>pwEmpty RU- EX	ELAV GS>pwEmpty RU+ UN	ELAV GS>pwEmpty RU+ EX
45	1
60	1
90	1
105	1
120	1
135	1
145	1
155	1
120		1
150		1
180		1
195		1
225		1
250		1
260		1
285		1
30			1
55			1
85			1
95			1
105			1
120			1
130			1
140			1
85				1
115				1
165				1
185				1
190				1
210				1
225				1
250				1
Figure S1C
age (weeks)	ElavGS-Q80-HA RU- UN							ElavGS-Q80-HA RU- EX							ElavGS-Q80-HA RU+ UN							ElavGS-Q80-HA RU+ EX
1	1.02633	0.955333	1.0451	0.973238	1.057	0.892992	0.925184	0.963179	0.99817	1.04983	0.988817	1.15115	1.06706	1.13607	1.15826	0.994139	0.879701	0.967896	0.984096	1.05939	0.948049	0.979363	1.00105	0.970573	1.04901	0.897503	0.964742	0.829166
1.5	0.945565	1.01727	0.92589	0.862062	0.781027	1.02261	0.984224	1.12427	1.04318	0.952217	0.96185	0.948641	0.955178	0.858078	0.993025	0.983458	0.807618	0.862811	0.7573	0.891886	0.83467	0.930154	0.802396	0.636122	0.762806	0.680422	0.784673	0.704175
2	0.933047	0.89498	0.705375	0.675919	0.602945	0.543566	0.634423	0.913231	0.950114	0.743967	0.782163	0.729596	0.626836	0.623415	0.813514	0.715	0.412001	0.384006	0.317868	0.357413	0.392748	0.818224	0.629511	0.444193	0.320936	0.400537	0.291726	0.404425
2.5	0.617479	0.57928	0.781464	0.653652	0.512919	0.618665	0.556549	0.680273	0.696024	0.879768	0.661115	0.674262	0.852862	0.749923	0.379934	0.329071	0.306729	0.348772	0.335039	0.302824	0.266414	0.394083	0.318566	0.421495	0.381642	0.368217	0.418928	0.334228
3	0.591188	0.514006	0.503166	0.459947	0.32199	0.350665	0.346334	0.594248	0.536855	0.563072	0.47423	0.548201	0.462998	0.532033	0.270592	0.185762	0.176623	0.161218	0.225056	0.196878	0.186253	0.294316	0.213747	0.252102	0.280325	0.254037	0.215734	0.223122
3.5	0.34706	0.218043	0.217666	0.194974	0.245624	0.203289	0.229019	0.419167	0.322274	0.293288	0.329973	0.261833	0.285045	0.280178	0.175565	0.116305	0.0800097	0.123848	0.12392	0.151869	0.114974	0.26394	0.133552	0.109246	0.117713	0.104558	0.163602	0.113616
4	0.236717	0.221336	0.210093	0.222896	0.195375	0.234995	0.188641	0.29211	0.324122	0.274766	0.24622	0.214664	0.235298	0.302194	0.0916446	0.108206	0.121764	0.142636	0.149792	0.105952	0.215074	0.129994	0.155135	0.112645	0.130057	0.125721	0.158516	0.104313
4.5	0.192583	0.181787	0.169577	0.181091	0.208369	0.198805	0.187798	0.266404	0.247497	0.281218	0.241568	0.259658	0.290858	0.26961	0.291229	0.28194	0.258429	0.211665	0.101734	0.224531	0.327577	0.252736	0.143808	0.29653	0.0851096	0.186533	0.154013	0.108608
[truncated: 31 more columns]

## Sheet: Figure S2
Figure S2A									Figure S2B
Age (Days)	w1118;Sqh gal4	Sqh>SCA3Q77	Sqh>dSesnWT;SCA3Q77	Sqh>dSesnCS;SCA3Q77	Sqh>dSesnDDAA;SCA3Q77	Sqh>dSesnAADD;SCA3Q77			Age (Days)	w1118;Sqh gal4	Sqh>SCA3Q77	Sqh>dSesnWT;SCA3Q77	Sqh>dSesnCS;SCA3Q77	Sqh>dSesnDDAA;SCA3Q77	Sqh>dSesnAADD;SCA3Q77
6	1								8	1
6	1								8	1
6	1								13	1
8	1								15	1
8	1								15	1
10	1								31	1
10	1								31	1
13	1								36	1
13	1								38	1
17	1								41	1
22	1								45	1
29	1								48	1
29	1								48	1
31	1								48	1
31	1								48	1
34	1								50	1
34	1								50	1
34	1								52	1
41	1								52	1
41	1								55	1
41	1								55	1
43	1								55	1
43	1								55	1
43	1								57	1
45	1								57	1
45	1								57	1
45	1								59	1
48	1								59	1
48	1								62	1
48	1								62	1
48	1								62	1
50	1								62	1
50	1								62	1
50	1								64	1
52	1								66	1
52	1								66	1
52	1								66	1
55	1								66	1
55	1								66	1
57	1								69	1
57	1								69	1
57	1								69	1
57	1								69	1
59	1								71	1
59	1								71	1
62	1								71	1
62	1								71	1
62	1								71	1
62	1								71	1
62	1								73	1
62	1								73	1
62	1								73	1
64	1								73	1
66	1								76	1
66	1								76	1
66	1								76	1
66	1								76	1
66	1								76	1
69	1								76	1
69	1								76	1
69	1								76	1
69	1								76	1
71	1								76	1
71	1								78	1
71	1								78	1
71	1								78	1
71	1								78	1
73	1								78	1
73	1								78	1
73	1								78	1
73	1								80	1
76	1								80	1
76	1								80	1
76	1								80	1
76	1								80	1
76	1								83	1
76	1								83	1
76	1								83	1
78	1								83	1
78	1								83	1
78	1								83	1
80	1								83	1
80	1								83	1
80	1								83	1
80	1								83	1
80	1								83	1
83	1								83	1
83	1								83	1
83	1								83	1
83	1								83	1
83	1								83	1
83	1								83	1
83	1								83	1
83	1								83	1
83	1								83	1
83	1								83	1
83	1								83	1
83	1								85	1
83	1								85	1
83	1								85	1
83	1								85	1
83	1								85	1
83	1								85	1
83	1								85	1
83	1								85	1
83	1								85	1
83	1								85	1
83	1								85	1
85	1								85	1
85	1								85	1
85	1								85	1
85	1								85	1
85	1								85	1
85	1								85	1
85	1								85	1
85	1								85	1
85	1								85	1
85	1								85	1
85	1								85	1
85	1								85	1
85	1								85	1
85	1								85	1
85	1								85	1
85	1								85	1
85	1								85	1
85	1								85	1
85	1								85	1
85	1								85	1
85	1								85	1
85	1								85	1
87	1								85	1
87	1								85	1
87	1								85	1
87	1								85	1
87	1								85	1
87	1								85	1
87	1								85	1
87	1								85	1
87	1								85	1
87	1								85	1
87	1								85	1
87	1								85	1
87	1								85	1
90	1								85	1
90	1								85	1
92	1								85	1
92	1								85	1
92	1								85	1
92	1								85	1
94	1								85	1
94	1								85	1
94	1								85	1
94	1								85	1
94	1								85	1
94	1								85	1
94	1								85	1
94	1								85	1
94	1								85	1
94	1								85	1
94	1								85	1
94	1								85	1
94	1								85	1
94	1								85	1
94	1								85	1
94	1								85	1
94	1								85	1
94	1								85	1
94	1								85	1
94	1								85	1
94	1								85	1
94	1								85	1
94	1								85	1
94	1								85	1
94	1								85	1
97	1								85	1
99	1								85	1
99	1								85	1
99	1								85	1
99	1								87	1
101	1								87	1
101	1								87	1
104	1								87	1
106	1								87	1
106	1								87	1
108	1								87	1
3		1							87	1
3		1							87	1
3		1							87	1
3		1							90	1
3		1							92	1
3		1							94	1
3		1							94	1
5		1							94	1
5		1							3		1
5		1							3		1
5		1							3		1
5		1							3		1
5		1							3		1
5		1							3		1
5		1							3		1
5		1							3		1
5		1							3		1
5		1							3		1
8		1							3		1
8		1							3		1
8		1							3		1
8		1							3		1
8		1							3		1
8		1							3		1
8		1							3		1
8		1							3		1
8		1							3		1
8		1							3		1
10		1							3		1
10		1							3		1
10		1							3		1
12		1							3		1
12		1							3		1
12		1							3		1
12		1							3		1
12		1							3		1
15		1							3		1
15		1							3		1
15		1							3		1
15		1							3		1
15		1							3		1
15		1							3		1
15		1							3		1
15		1							3		1
15		1							3		1
15		1							3		1
15		1							3		1
17		1							3		1
17		1							3		1
17		1							3		1
17		1							3		1
17		1							3		1
19		1							3		1
22		1							3		1
22		1							3		1
22		1							5		1
22		1							5		1
22		1							5		1
22		1							5		1
24		1							5		1
26		1							5		1
26		1							5		1
29		1							5		1
29		1							5		1
29		1							5		1
29		1							5		1
31		1							5		1
31		1							8		1
31		1							8		1
31		1							8		1
31		1							8		1
31		1							8		1
33		1							8		1
33		1							8		1
33		1							8		1
33		1							10		1
33		1							10		1
33		1							10		1
33		1							10		1
33		1							12		1
33		1							12		1
33		1							15		1
33		1							15		1
36		1							15		1
36		1							15		1
36		1							15		1
36		1							17		1
36		1							17		1
36		1							17		1
36		1							17		1
36		1							19		1
36		1							19		1
36		1							22		1
36		1							22		1
36		1							22		1
36		1							24		1
36		1							26		1
36		1							29		1
38		1							29		1
38		1							29		1
38		1							29		1
38		1							29		1
38		1							29		1
38		1							29		1
38		1							29		1
38		1							29		1
38		1							31		1
38		1							31		1
38		1							31		1
38		1							31		1
38		1							31		1
38		1							31		1
38		1							31		1
38		1							31		1
38		1							31		1
38		1							31		1
38		1							31		1
38		1							31		1
38		1							31		1
38		1							31		1
38		1							31		1
38		1							33		1
38		1							33		1
38		1							33		1
38		1							33		1
38		1							33		1
38		1							33		1
38		1							33		1
38		1							33		1
38		1							33		1
38		1							33		1
38		1							33		1
38		1							36		1
38		1							36		1
38		1							36		1
38		1							36		1
38		1							36		1
38		1							36		1
38		1							36		1
38		1							36		1
38		1							36		1
38		1							36		1
38		1							36		1
38		1							36		1
38		1							36		1
38		1							36		1
40		1							36		1
40		1							36		1
40		1							36		1
40		1							36		1
40		1							36		1
40		1							36		1
40		1							36		1
40		1							36		1
40		1							36		1
40		1							36		1
40		1							38		1
40		1							38		1
40		1							38		1
40		1							38		1
40		1							38		1
40		1							38		1
40		1							38		1
40		1							38		1
40		1							38		1
40		1							38		1
40		1							38		1
40		1							38		1
40		1							38		1
40		1							38		1
40		1							38		1
43		1							38		1
43		1							38		1
43		1							38		1
43		1							40		1
43		1							40		1
43		1							40		1
43		1							40		1
43		1							3			1
43		1							3			1
43		1							3			1
43		1							3			1
43		1							3			1
43		1							3			1
43		1							3			1
45		1							3			1
45		1							3			1
45		1							5			1
45		1							5			1
45		1							5			1
45		1							5			1
45		1							5			1
45		1							5			1
45		1							5			1
45		1							5			1
47		1							5			1
47		1							8			1
47		1							8			1
47		1							8			1
47		1							8			1
47		1							8			1
3			1						10			1
5			1						10			1
5			1						12			1
5			1						12			1
5			1						15			1
5			1						15			1
5			1						17			1
5			1						19			1
5			1						19			1
5			1						19			1
5			1						22			1
8			1						22			1
8			1						22			1
8			1						24			1
8			1						24			1
8			1						29			1
8			1						29			1
8			1						31			1
8			1						31			1
8			1						33			1
8			1						36			1
8			1						36			1
8			1						36			1
8			1						36			1
8			1						36			1
12			1						36			1
12			1						36			1
12			1						36			1
12			1						43			1
15			1						47			1
15			1						3				1
19			1						3				1
22			1						3				1
22			1						3				1
22			1						3				1
22			1						3				1
24			1						3				1
24			1						3				1
24			1						3				1
26			1						3				1
29			1						3				1
29			1						3				1
29			1						5				1
31			1						5				1
33			1						5				1
33			1						5				1
33			1						5				1
33			1						5				1
33			1						8				1
36			1						8				1
36			1						8				1
36			1						8				1
36			1						12				1
36			1						15				1
36			1						17				1
36			1						17				1
36			1						19				1
36			1						19				1
36			1						22				1
36			1						26				1
36			1						26				1
36			1						29				1
36			1						29				1
36			1						29				1
38			1						29				1
38			1						29				1
38			1						31				1
38			1						31				1
38			1						33				1
38			1						36				1
38			1						36				1
38			1						3					1
40			1						3					1
3				1					3					1
3				1					3					1
3				1					3					1
3				1					3					1
3				1					3					1
3				1					3					1
3				1					3					1
3				1					3					1
5				1					3					1
5				1					3					1
5				1					3					1
5				1					3					1
5				1					3					1
8				1					3					1
8				1					5					1
8				1					5					1
8				1					5					1
8				1					5					1
8				1					5					1
15				1					5					1
15				1					5					1
22				1					5					1
24				1					5					1
26				1					5					1
29				1					5					1
29				1					5					1
29				1					8					1
31				1					8					1
31				1					8					1
31				1					8					1
33				1					8					1
33				1					8					1
33				1					8					1
33				1					8					1
33				1					8					1
36				1					15					1
36				1					17					1
36				1					19					1
36				1					19					1
36				1					22					1
36				1					22					1
36				1					26					1
36				1					29					1
36				1					29					1
36				1					29					1
36				1					29					1
36				1					29					1
36				1					29					1
36				1					29					1
36				1					29					1
38				1					29					1
38				1					29					1
38				1					29					1
38				1					29					1
40				1					29					1
3					1				29					1
3					1				29					1
3					1				29					1
5					1				29					1
5					1				31					1
5					1				31					1
8					1				31					1
8					1				31					1
8					1				31					1
17					1				31					1
19					1				31					1
19					1				31					1
29					1				31					1
29					1				31					1
29					1				31					1
31					1				33					1
31					1				33					1
31					1				33					1
31					1				33					1
31					1				36					1
33					1				36					1
33					1				36					1
33					1				36					1
33					1				36					1
33					1				36					1
36					1				38					1
36					1				3						1
36					1				3						1
36					1				3						1
36					1				3						1
36					1				3						1
36					1				3						1
36					1				3						1
36					1				3						1
36					1				3						1
36					1				3						1
36					1				5						1
36					1				5						1
36					1				5						1
36					1				5						1
36					1				5						1
36					1				5						1
36					1				8						1
36					1				8						1
36					1				8						1
36					1				8						1
36					1				8						1
36					1				8						1
36					1				8						1
36					1				8						1
36					1				8						1
36					1				8						1
36					1				10						1
36					1				10						1
36					1				10						1
36					1				12						1
36					1				12						1
36					1				15						1
36					1				15						1
36					1				15						1
36					1				15						1
36					1				15						1
36					1				15						1
38					1				15						1
38					1				17						1
38					1				19						1
38					1				24						1
38					1				26						1
38					1				26						1
38					1				29						1
38					1				29						1
38					1				29						1
38					1				29						1
38					1				29						1
38					1				29						1
38					1				29						1
38					1				29						1
38					1				29						1
38					1				29						1
38					1				29						1
38					1				29						1
43					1				29						1
3						1			29						1
3						1			29						1
3						1			31						1
3						1			31						1
3						1			31						1
3						1			31						1
3						1			31						1
3						1			31						1
5						1			31						1
5						1			33						1
8						1			33						1
8						1			33						1
8						1			33						1
8						1			36						1
8						1			36						1
10						1			36						1
10						1			36						1
15						1			38						1
15						1
15						1
17						1
19						1
19						1
22						1
22						1
22						1
26						1
29						1
29						1
29						1
29						1
29						1
29						1
31						1
31						1
31						1
31						1
31						1
31						1
31						1
33						1
33						1
33						1
33						1
33						1
33						1
33						1
33						1
33						1
33						1
33						1
36						1
36						1
36						1
36						1
36						1
36						1
36						1
36						1
36						1
36						1
36						1
36						1
36						1
36						1
36						1
36						1
36						1
36						1
36						1
36						1
36						1
36						1
36						1
38						1
38						1
38						1
38						1
38						1
47						1

[truncated: 1 more sheets: Figure S3]
